# Supplementary material for: Gaps in Study Design for Immune Parameter Research for Latent Tuberculosis Infection: A Systematic Review
Source: J Immunol Res. 2020 Apr 21;2020:8074183. doi: 10.1155/2020/8074183 (PMC7191376; doi:10.1155/2020/8074183)
Supplement: Supplementary Materials — Additional file 1: search strategies conducted in the systematic review. Additional file 2: summary of excluded studies and the reasons. Additional file 3: quality of cohort studies (risk of bias evaluation). Additional file 4: quality of cross-sectional studies (risk of bias evaluation). Additional file 5: immune factors, production cell, diana cell, and effect in different tuberculosis stages. Additional file 6: concentration of immune factors in persons with different tuberculosis stages in the papers included in the systematic review. [file 8074183.f1.xlsx]

## Sheet: S1-Search strategies
Date 1	Database	Search details	Search results
2016-07-24	PUBMED	cytokines[MeSH Major Topic] AND "latent tuberculosis"[MeSH Major Topic] AND (hasabstract[text] AND "2006/07/28"[PDat] : "2016/07/24"[PDat] AND "humans"[MeSH Terms] AND "adult"[MeSH Terms])	167
2016-09-13	Academic Google	cytokine and latent tuberculosis -animals -children -hiv	13
2016-09-13	PUBMED	"latent tuberculosis"[MeSH Terms] AND "biomarkers"[MeSH Terms] AND (hasabstract[text] AND "2006/09/13"[PDat] : "2016/09/13"[PDat] AND "humans"[MeSH Terms] AND "adult"[MeSH Terms])	83
2016-09-13	Academic Google	biomarkers and latent tuberculosis -animals -children -hiv	5
2016-10-10	PUBMED	"mycobacterium tuberculosis"[MeSH Terms] AND "cytokines"[MeSH Terms] AND "latent tuberculosis"[MeSH Terms] AND (hasabstract[text] AND "2006/10/14"[PDAT] : "2016/10/10"[PDAT] AND "humans"[MeSH Terms] AND "adult"[MeSH Terms])	127
2016-10-10	Academic Google	Mycobacterium tuberculosis AND cytokines AND latent tuberculosis ­children ­animals ­hiv ­ Google Académico	1
2016-10-23	PUBMED	(latent tuberculosis[MeSH Major Topic]) AND biomarkers[Text Word]	65
2016-10-23	Academic Google	latent tuberculosis AND biomarkers ­animals, ­children, ­HIV,	2
2016-10-23	PUBMED	(latent tuberculosis[MeSH Major Topic]) AND cytokine[Text Word]	34
2017-06-09	PUBMED	"cytokines"[MeSH Major Topic] AND "latent tuberculosis"[MeSH Major Topic] AND (("2016/10/01"[PDAT] : "2017/04/17"[PDAT]) AND "humans"[MeSH Terms] AND "adult"[MeSH Terms])	4
2017-06-09	Academic Google	cytokine AND latent tuberculosis ­animals, ­children, ­HIV	2
2017-06-09	PUBMED	"latent tuberculosis"[MeSH Major Topic] AND "biomarkers"[MeSH Major Topic] AND (("2016/10/01"[PDAT] : "2017/04/17"[PDAT]) AND "humans"[MeSH Terms] AND "adult"[MeSH Terms])	0
2017-06-09	Academic Google	allintitle: latent tuberculosis AND biomarkers -children ­animals ­hiv	0
2017-06-09	PUBMED	("mycobacterium tuberculosis"[MeSH Major Topic] AND "cytokines"[MeSH Major Topic]) AND "latent tuberculosis"[MeSH Major Topic] AND (("2016/10/01"[PDAT] : "2017/04/17"[PDAT]) AND "humans"[MeSH Terms] AND "adult"[MeSH Terms])	3
2017-06-09	Academic Google	allintitle: Mycobacterium tuberculosis AND cytokines AND latent tuberculosis -children -animals -hiv	0
2018-07-11	PUBMED	("mycobacterium tuberculosis"[MeSH Major Topic] AND "cytokines"[MeSH Major Topic]) AND "latent tuberculosis"[MeSH Major Topic] AND (("2017/04/17"[PDAT] : "2018/07/10"[PDAT]) AND "humans"[MeSH Terms] AND "adult"[MeSH Terms])	5
2018-07-11	Academic Google	cytokine AND latent tuberculosis ­animals, ­children, ­HIV	3
2018-07-11	PUBMED	"latent tuberculosis"[MeSH Major Topic] AND "biomarkers"[MeSH Major Topic] AND (("2017/04/17"[PDAT] : "2018/07/10"[PDAT]) AND "humans"[MeSH Terms] AND "adult"[MeSH Terms])	1
2018-07-11	Academic Google	allintitle: latent tuberculosis AND biomarkers -children ­animals ­hiv	0
2018-07-11	Academic Google	allintitle: Mycobacterium tuberculosis AND cytokines AND latent tuberculosis -children -animals -hiv	0
2018-07-11	PUBMED	"cytokines"[MeSH Major Topic] AND "latent tuberculosis"[MeSH Major Topic] AND (("2017/04/17"[PDAT] : "2018/07/10"[PDAT]) AND "humans"[MeSH Terms] AND "adult"[MeSH Terms])	15
TOTAL			530

## Sheet: S2-Summaries excluded
Number	Article title	Year	First author	Journal	Reason for rejection			Study	Reason for exclusion
1	The Significance of Sensitive Interferon Gamma Release Assays for Diagnosis of Latent Tuberculosis Infection in Patients Receiving Tumor Necrosis Factor-α Antagonist Therapy.	2015	Jung YJ	PLoS One	The study assessed the production of IFN-g as part of the IGRA’s evaluation or that used cytokines/chemokines as diagnostic method for active TB or LTBI			Irene Andia Biraro, 2016	Population of study
2	Serial interferon-gamma release assays for latent tuberculosis in dialysis patients with end stage renal disease in a Korean population.	2015	Lee SH	BMC Infect Dis	The study assessed the production of IFN-g as part of the IGRA’s evaluation or that used cytokines/chemokines as diagnostic method for active TB or LTBI			P. Bittel, 2014	Purpose different from the revision+B53
3	CD4 T-cell cytokine correlates of diagnostic test for latent tuberculosis infection in HIV-1- infected subjects	2015	Van Epps P	Int J Tuberc Lung Dis	Immunocompromised individuals or studies exclusively conducted in children			Adane Mihret, 2012	Population of study
4	Comparison of interferon gamma release assay & tuberculin skin tests for diagnosis of latent tuberculosis in patients on maintenance haemodialysis.	2015	Agarwal SK	Indian J Med Res.	The study assessed the production of IFN-g as part of the IGRA’s evaluation or that used cytokines/chemokines as diagnostic method for active TB or LTBI			Marc Frahm, 2010	It is not original article
5	FN-γ/TNF-α ratio in response to immuno proteomically identified human T-cell antigens of Mycobacterium tuberculosis - The most suitable surrogate biomarker for latent TB infection.	2015	Prabhavathi M	J Infect	Aim of the study different to the objective of this SR			Patricio Escalante, 2014	It is not original article
6	The impact of anti-tuberculous antibiotics and corticosteroids on cytokine production in QuantiFERON-TB Gold In Tube assays.	2015	Clifford	Tuberculosis	The study assessed the production of IFN-g as part of the IGRA’s evaluation or that used cytokines/chemokines as diagnostic method for active TB or LTBI			Namuganga, Anna Ritah, 2013	It is not original article
7	Diagnosing latent tuberculosis in immunocompromised patients measuring blood IP-10 production capacity: an analysis of chronic renal failure patients.	2015	Gunluoglu G	Intern Med	Immunocompromised individuals or studies exclusively conducted in children			Johannes Nemeth, 2010	Population of study
8	QuantiFERON-TB Gold In-Tube assay for screening arthritis patients for latent tuberculosis infection before starting anti-tumor necrosis factor	2015	Lee H	PLoS One	The study assessed the production of IFN-g as part of the IGRA’s evaluation or that used cytokines/chemokines as diagnostic method for active TB or LTBI			ZB Machuki, 2010	It is not original article
9	Comparison of LTBI treatment regimens for patients receiving anti-tumour necrosis factor therapy.	2015	Park SJ	Int J Tuberc Lung Dis.	Aim of the study different to the objective of this SR			Miriam Lichtner, 2015	Purpose different from the revision
10	Filarial infection modulates the immune response to Mycobacterium tuberculosis through expansion of CD4+ IL-4 memory T cells.	2015	Chatterjee S	J Immunol	Aim of the study different to the objective of this SR			Vasil'eva EV, 2013	Language
11	The risk of tuberculosis in Korean patients with inflammatory bowel disease receiving tumor necrosis factor-α blockers.	2015	Byun JM	J Korean Med Sci.	Aim of the study different to the objective of this SR			Yoshiro Yamashita, 2013	The analysis did not discriminate between TBA and LTBI
12	Pulmonary sarcoidosis and latent tuberculosis in a patient with psoriasis treated with adalimumab.	2015	Korta DZ	Dermatol Online J.	Aim of the study different to the objective of this SR			M. Ruhwald, 2008	Population of study
13	IP-10 differentiates between active and latent tuberculosis irrespective of HIV status and declines during therapy.	2015	Wergeland I	J Infect	Immunocompromised individuals or studies exclusively conducted in children			Morten Ruhwald, 2009	Do not evaluate LTBI
14	Risks for opportunistic tuberculosis infection in a cohort of 873 patients with inflammatory bowel disease receiving a tumor necrosis factor-α inhibitor.	2015	Byun JM	Scand J Gastroenterol.	Aim of the study different to the objective of this SR			Delia Goletti, 2010	Do not evaluate LTBI
15	Latent tuberculosis treatment results in patients that taken TNF-alpha blockers at Ankara Numune Training and Research Hospital Chest Diseases Clinic for last 8 years (2006-2013)	2014	Demir S	Tuberk Toraks.	Aim of the study different to the objective of this SR			Jayne S. Sutherland, 2009	The analysis did not discriminate between TBA and LTBI
16	Risk of tuberculosis in patients treated with anti-tumor necrosis factor therapy: a nationwide study in South Korea, a country with an intermediate tuberculosis burden.	2015	Jung SM	Int J Rheum Dis.	Aim of the study different to the objective of this SR			Whittaker E, 2008	Population of study
17	Diagnostic performance of a cytokine and IFN-γ-induced chemokine mRNA assay after Mycobacterium tuberculosis-specific antigen stimulation in whole blood from infected individuals.	2015	Kim S	J Mol Diagn.	The study assessed the production of IFN-g as part of the IGRA’s evaluation or that used cytokines/chemokines as diagnostic method for active TB or LTBI			Lifan Zhang, 2017	Purpose different from the revision
18	Mycobacterium tuberculosis epitope-specific interferon-g production in healthy Brazilians reactive and non-reactive to tuberculin skin test.	2014	Silva BC	Mem Inst Oswaldo Cruz	Aim of the study different to the objective of this SR			Xuejuan Bai, 2017	Evaluate molecules that are not the object of this study
19	QuantiFERON–TB Gold In-Tube test performance in Denmark.	2014	Hermansen T	Tuberculosis	The study assessed the production of IFN-g as part of the IGRA’s evaluation or that used cytokines/chemokines as diagnostic method for active TB or LTBI			Emilie Borgstro ̈m, 2012	Purpose different from the revision
20	Feasibility of the interferon-gamma enzyme-linked immunospot assay in chronic renal failure patients and immunocompetent subjects: a head-to-head comparison.	2015	Gorek Dilektasli A	Ren Fail.	Immunocompromised individuals or studies exclusively conducted in children			Xinjing Wang, 2012	Do not evaluate LTBI
21	Effect of isoniazid on antigen-specific interferon-γ secretion in latent tuberculosis.	2015	Torres M	Eur Respir J.	Aim of the study different to the objective of this SR			Kristin Skogstrand, 2012	Purpose different from the revision
22	Prevention of anti-tumor necrosis factor-associated tuberculosis: a 10-year longitudinal cohort study.	2015	Muñoz L	Clin Infect Dis.	Aim of the study different to the objective of this SR			Andradare BB, 2013	Evaluate molecules that are not the object of this study, duplicate from Bayer-Maker, 2014
23	LTBI screening in rheumatoid arthritis patients prior to anti-TNF treatment	2014	Bonfiglioli KR	Int J Tuberc Lung Dis	Aim of the study different to the objective of this SR
24	Diagnosis of latent tuberculosis infection before initiation of anti-tumor necrosis factor therapy using both tuberculin skin test and QuantiFERON-TB Gold In Tube assay.	2014	Kim HC	Scand J Infect Dis	Aim of the study different to the objective of this SR
25	Development of a one-step probe based molecular assay for rapid immunodiagnosis of infection with M. tuberculosis using dried blood spots.	2014	Blauenfeldt T	PLoS One.	The study assessed the production of IFN-g as part of the IGRA’s evaluation or that used cytokines/chemokines as diagnostic method for active TB or LTBI
26	IGRA as a predictive factor of silent pulmonary changes in individualsfollowing exposure to tuberculosis	2014	Targowski T	Lung	The study assessed the production of IFN-g as part of the IGRA’s evaluation or that used cytokines/chemokines as diagnostic method for active TB or LTBI
27	Follow-up testing of interferon-gamma release assays are useful in ankylosing spondylitis patients receiving anti-tumor necrosis factor alpha for latent tuberculosis infection.	2014	Son CN	J Korean Med Sci	Immunocompromised individuals or studies exclusively conducted in children
28	Analysis of predictors influencing indeterminate whole-blood interferon-gamma release assay results in patients with rheumatic diseases.	2014	Jung HJ	Rheumatol Int	Aim of the study different to the objective of this SR
29	Active tuberculosis risk with tumor necrosis factor inhibitors after treating latent tuberculosis.	2014	Kwon M	J Clin Rheumatol	Aim of the study different to the objective of this SR
30	The use of TNF-α blockers in psoriatic arthritis patients with latent tuberculosis infection.	2014	Atteno M	Clin Rheumatol	Aim of the study different to the objective of this SR
31	Short-course treatment of latent tuberculosis infection in patients with rheumatic conditions proposed for anti-TNF therapy.	2015	Valls V	Clin Rheumatol	Immunocompromised individuals or studies exclusively conducted in children
32	Combined determination of spontaneous and antigen-induced production of cytokines for differential diagnostics of active tuberculosis of lungs and latent tuberculosis infection].	2013	Vasil'eva EV	Zh Mikrobiol Epidemiol Immunobiol	Language different to Spanish, English and Portuguese
33	Expression and bioinformatic analysis of miR-29 family, target gene IFN-γ in CD4(+) T cells from subjects with latent tuberculosis infection].	2013	Yi ZJ	Zhonghua Yu Fang Yi Xue Za Zhi	Language different to Spanish, English and Portuguese
34	Usefulness of QuantiFERON-TB Gold tets in psoriatic patients under treatment with tumour necrosis factor blockers	2014	Saraceno R	Expert Opin Biol Ther	Aim of the study different to the objective of this SR
35	Potential association of pulmonary tuberculosis with genetic polymorphisms of toll-like receptor 9 and interferon-gamma in a Chinese population.	2013	Yang Y	BMC Infect Dis	Aim of the study different to the objective of this SR
36	Intermediate to long-term follow-up results of INH chemoprophylaxis prior to anti-TNF-alpha therapy in a high-risk area for tuberculosis.	2013	Kurt OK	Wien Klin Wochnschr	Aim of the study different to the objective of this SR
37	Interferon-γ responses to Mycobacterium tuberculosis Rpf proteins in contact investigation.	2013	Huang W	Tuberculosis	Aim of the study different to the objective of this SR
38	Evaluation of screening methods for identification of patients with chronic rheumatological disease requiring tuberculosis chemoprophylaxis prior to commencement of TNF-α antagonist therapy.	2013	Singanayagam	Thorax	Aim of the study different to the objective of this SR
39	Comparison of two interferon-gamma release assays (QuantiFERON-TB Gold In-Tube and T-SPOT.TB) in testing for latent tuberculosis infection among HIV-infected adults.	2013	Sultan B	Int J STD AIDS	Immunocompromised individuals or studies exclusively conducted in children
40	Interferon gamma release assays and the NICE 2011 guidelines on the diagnosis of latent tuberculosis.	2013	Mujakperuo HR	Clin Med	Aim of the study different to the objective of this SR
41	Prophylaxis for latent tuberculosis infection prior to anti–tumor necrosis factor therapy in low-risk elderly patients with rheumatoid arthritis: a decision analysis.	2013	Hazlewood	arthritis Care Res	Aim of the study different to the objective of this SR
42	Multicolor flow cytometric analyses of CD4+ T cell responses to Mycobacterium tuberculosis-related latent antigens.	2013	Yamashita Y	Jpn J Infect Dis	Aim of the study different to the objective of this SR
43	Contribution of interferon-γ release assays (IGRAs) to the diagnosis of latent tuberculosis infection after renal transplantation.	2013	Hadaya K	Transplantation	Aim of the study different to the objective of this SR
44	Tuberculosis during TNF-α inhibitor therapy, despite screening.	2013	Hofland RW	Thorax	Aim of the study different to the objective of this SR
45	Screening for latent tuberculosis in Norwegian health care workers: high frequency of discordant tuberculin skin test positive and interferon-gamma release assay negative results.	2013	Gran G	BMC Public Health	Aim of the study different to the objective of this SR
46	How frequently do tuberculosis screening tests convert in inflammatory bowel disease patients on anti-tumour necrosis factor-alpha? A pilot study.	2013	Bermejo F	Dig Liver Dis	Aim of the study different to the objective of this SR
47	Tuberculosis in anti-TNF-α treated patients remains a problem in countries with an intermediate incidence: analysis of 25 patients matched with a control population.	2013	Abreu C	J Crohns Colitis	Aim of the study different to the objective of this SR
48	Comparison of Quantiferon-TB Gold versus tuberculin skin test for tuberculosis screening in inflammatory bowel disease patients.	2013	Andrisani G	J Gastrointestin Liver Dis	The study assessed the production of IFN-g as part of the IGRA’s evaluation or that used cytokines/chemokines as diagnostic method for active TB or LTBI
49	Performance of tuberculin skin test compared to QFT-IT to detect latent TB among high-risk contacts in Mexico.	2013	Serrano-Escoberco CJ	Arch Med Res	The study assessed the production of IFN-g as part of the IGRA’s evaluation or that used cytokines/chemokines as diagnostic method for active TB or LTBI
50	Importance of tuberculosis screening before inhibiting tumour necrosis factor-alpha therapy.	2013	García-López	Arch Soc Esp Oftalmol	Descriptive study, case reports and series, and reviews
51	Interferon gamma release assays for the diagnosis of latent TB infection in HIV-infected individuals in a low TB burden country.	2013	Cheallaigh CN	PLoS One	The study assessed the production of IFN-g as part of the IGRA’s evaluation or that used cytokines/chemokines as diagnostic method for active TB or LTBI
52	Can an individual with a positive baseline QuantiFERON test result 60. develop active tuberculosis?].	2012	Yi L	Kekkaku	Language different to Spanish, English and Portuguese
53	Dried plasma spots in the diagnosis of tuberculosis: IP-10 release assay on filter paper.	2013	Aabye MG	Eur Respir J.	Aim of the study different to the objective of this SR
54	Interferon γ in patients with HIV/AIDS and suspicion or latent tuberculosis infection.	2013	García-Elorriaga G	Asian Pac J Trop Med	Immunocompromised individuals or studies exclusively conducted in children
55	Screening for latent TB in patients with rheumatic disorders prior to biologic agents in a 'high-risk' TB population: comparison of two interferon gamma release assays.	2014	Melath S	Rheumatol Int	The study assessed the production of IFN-g as part of the IGRA’s evaluation or that used cytokines/chemokines as diagnostic method for active TB or LTBI
56	Interferon-γ ELISPOT as a biomarker of treatment efficacy in latent tuberculosis infection: a clinical trial.	2013	Adetifa IM	Am J Respir Crit Med	Aim of the study different to the objective of this SR
57	Mycobacterial interferon-γ release variations during longterm treatment with tumor necrosis factor blockers: lack of correlation with clinical outcome.	2013	Scrivo R	J Rheumatol	Aim of the study different to the objective of this SR
58	Tuberculosis skin test, but not interferon-γ-releasing assays is affected by BCG vaccination in HIV patients.	2013	Wolf T	J Infect	Immunocompromised individuals or studies exclusively conducted in children
59	In vitro immunomodulation of a whole blood IFN-γ release assay enhances T cell responses in subjects with latent tuberculosis infection.	2012	Gaur RL	PLoS One	The study assessed the production of IFN-g as part of the IGRA’s evaluation or that used cytokines/chemokines as diagnostic method for active TB or LTBI
60	Serial QuantiFERON TB-gold in-tube testing during LTBI therapy in candidates for TNFi treatment.	2013	Bartalesi F	J Infect	Aim of the study different to the objective of this SR
61	Interferon gamma mRNA quantitative real-time polymerase chain reaction for the diagnosis of latent tuberculosis: a novel interferon gamma release assay.	2013	Kim S	Diagn Microbiol Infect Dis	The study assessed the production of IFN-g as part of the IGRA’s evaluation or that used cytokines/chemokines as diagnostic method for active TB or LTBI
62	Quantiferon TB Gold and tuberculin skin tests for the detection of latent tuberculosis infection in patients treated with tumour necrosis factor alpha blocking agents.	2013	Klein M	Clin Exp Rheumatol	Aim of the study different to the objective of this SR
63	Severe psoriasis with positive tuberculosis test and treatment with biologic therapy: a case report.	2012	Skroza N	Cutis	Descriptive study, case reports and series, and reviews
64	Yield and cost effectiveness of mycobacterial infection detection using a simple IGRA-based protocol in UK subjects with inflammatory bowel disease suitable for anti-TNFα therapy.	2013	Greveson K	J Crohns Colitis	Aim of the study different to the objective of this SR
65	Retesting for latent tuberculosis in patients with inflammatory bowel disease treated with TNF-α inhibitors.	2012	Papay P	Aliment Pharmacol Ther	Aim of the study different to the objective of this SR
66	Use of Quantiferon-TB-Gold in Tube(®) test for detecting latent tuberculosis in patients considered as candidates for anti-TNF therapy in routine clinical practice.	2013	García-Gasalla M	Enferm Infecc Microbiol Clin	The study assessed the production of IFN-g as part of the IGRA’s evaluation or that used cytokines/chemokines as diagnostic method for active TB or LTBI
67	Screening for latent tuberculosis in anti-TNF-α candidate patients in a high tuberculosis incidence setting.	2012	Saidenberg-Kermanac'h N	Int J Tuberc Lung Dis	The study assessed the production of IFN-g as part of the IGRA’s evaluation or that used cytokines/chemokines as diagnostic method for active TB or LTBI
68	Combined use of a TST and the T-SPOT®.TB assay for latent tuberculosis infection diagnosis before anti-TNF-α treatment.	2012	Jung YJ	Int J Tuberc Lung Dis	The study assessed the production of IFN-g as part of the IGRA’s evaluation or that used cytokines/chemokines as diagnostic method for active TB or LTBI
69	Programmatic impact of QuantiFERON-TB Gold In-Tube implementation on latent tuberculosis diagnosis and treatment in a public health clinic.	2012	Shah M	PLoS One	The study assessed the production of IFN-g as part of the IGRA’s evaluation or that used cytokines/chemokines as diagnostic method for active TB or LTBI
70	Heparin-binding hemagglutinin induces IFN-γ(+) IL-2(+) IL-17(+) multifunctional CD4(+) T cells during latent but not active tuberculosis disease.	2012	Loxton AG	Clin Vaccine Immunol	Aim of the study different to the objective of this SR
71	Predictive value of interferon-γ ELISPOT assay in HIV 1-infected patients in an intermediate tuberculosis-endemic area.	2012	Kim YJ	AIDS Res Hum Retroviruses	Aim of the study different to the objective of this SR
72	Acceptance of interferon-gamma release assay by a high-risk urban cohort	2011	O'Donnell MR	Int J Tuberc Lung Dis	The study assessed the production of IFN-g as part of the IGRA’s evaluation or that used cytokines/chemokines as diagnostic method for active TB or LTBI
73	Interferon-gamma release assays in the detection of latent tuberculosis infection in patients with inflammatory arthritis scheduled for anti-tumour necrosis factor treatment.	2012	Mínguez S	Clin Rheumatol	The study assessed the production of IFN-g as part of the IGRA’s evaluation or that used cytokines/chemokines as diagnostic method for active TB or LTBI
74	Comparative performance of tuberculin skin test and QuantiFERON TB-gold in contact investigations for tuberculosis	2011	Komukai J	Kekkaku	Language different to Spanish, English and Portuguese
75	T cell responses to DosR and Rpf proteins in actively and latently infected individuals from Colombia.	2012	Riaño F	Tuberculosis	Aim of the study different to the objective of this SR
76	Evaluation of a tuberculosis whole-blood interferon-γ chemiluminescent immunoassay among Chinese military recruits.	2011	Wu X	Mol Diagn ther	The study assessed the production of IFN-g as part of the IGRA’s evaluation or that used cytokines/chemokines as diagnostic method for active TB or LTBI
77	Interferon gamma release assay (QuantiFERON-TB Gold In Tube) in patients of sarcoidosis from a population with high prevalence of tuberculosis infection.	2011	Gupta D	Sarcoidiosis Vasc Diffuse Lung Dis	The study assessed the production of IFN-g as part of the IGRA’s evaluation or that used cytokines/chemokines as diagnostic method for active TB or LTBI
78	Higher frequency of T-cell response to M. tuberculosis latency antigen Rv2628 at the site of active tuberculosis disease than in peripheral blood.	2011	Chiacchio T	PLoS One	Aim of the study different to the objective of this SR
79	Detection of latent tuberculosis infection in rheumatologic diseases before anti-TNFα therapy: tuberculin skin test versus IFN-γ assay.	2012	Hanta I	Rheumatol Int	The study assessed the production of IFN-g as part of the IGRA’s evaluation or that used cytokines/chemokines as diagnostic method for active TB or LTBI
80	The effectiveness of using interferon-gamma release assays in screening immigration employees for latent tuberculosis infection.	2011	De Perio MA	Int J Occup Environ Health	Aim of the study different to the objective of this SR
81	Serial interferon-gamma release assays for the diagnosis of latent tuberculosis infection in patients treated with immunosuppressive agents.	2011	Kim KH	Korean J Lab Med	Aim of the study different to the objective of this SR
82	Feasibility of latent tuberculosis infection diagnosis by interferon-γ release assay remote from testing facilities.	2011	Trauer JM	Commun Dis Intell Q Rep	Aim of the study different to the objective of this SR
83	CCL2/MCP-I genotype-phenotype relationship in latent tuberculosis infection.	2011	Hussain R	PLoS One	Aim of the study different to the objective of this SR
84	Detecting latent tuberculosis infection during anti-tumor necrosis factor therapy.	2011	Ringrose JS	Clin Exp Rheumatol	Aim of the study different to the objective of this SR
85	Diagnosing latent tuberculosis infection in haemodialysis patients: T-cell based assay (T-SPOT.TB) or tuberculin skin test?	2012	Soysal A	Nephrol Dial Transplant	The study assessed the production of IFN-g as part of the IGRA’s evaluation or that used cytokines/chemokines as diagnostic method for active TB or LTBI
86	High prevalence of latent tuberculosis infection in autoimmune disorders such as psoriasis and in chronic respiratory diseases, including lung cancer.	2011	Bordignon V	J Biol Homeost Agents	Aim of the study different to the objective of this SR
87	Tuberculosis infection in rheumatic patients with infliximab therapy: experience with 157 patients.	2012	Nobre CA	Rheumatol Int	Aim of the study different to the objective of this SR
88	Is it safe to use anti-TNF-α agents for tuberculosis in children suffering with chronic rheumatic disease?	2012	Kilic O	Rheumatol Int	Aim of the study different to the objective of this SR
89	Diagnosis and treatment of latent tuberculosis in patients with chronic inflammatory diseases: use of TNF-alpha-targeting biological products.	2011	Lopes DM	J Bras Pneumol	Aim of the study different to the objective of this SR
90	Predictors of discordant tuberculin skin test and QuantiFERON®-TB Gold In-Tube results in various high-risk groups.	2011	Weinfurter P	Int J Tuberc Lung Dis	The study assessed the production of IFN-g as part of the IGRA’s evaluation or that used cytokines/chemokines as diagnostic method for active TB or LTBI
91	Interferon-gamma assays T-SPOT.TB for the diagnosis of latent tuberculosis infection].	2011	Borkowska	Pneumonol Alergol Pol	Language different to Spanish, English and Portuguese
92	Incidence of tuberculosis infection in psoriatic patients on anti-TNF therapy: report of a case series with 144 patients.	2011	Sánchez-Moya AI	J Eur Acad Dermatol Venereol	Descriptive study, case reports and series, and reviews
93	Interferon-γ release assay in the diagnosis of latent tuberculosis infection in arthritis patients treated with tumor necrosis factor antagonists in Korea.	2011	Chang B	Clin Rheumatol	Aim of the study different to the objective of this SR
94	Prevalence of latent tuberculosis infection among health care workers from the emergency department of Meaux hospital using an interferon gamma release assay].	2011	Faibis F	Presse Med	Language different to Spanish, English and Portuguese
95	Patients with psoriasis are more likely to be treated for latent tuberculosis infection prior to biologics than patients with inflammatory bowel disease.	2011	Bassukas	Acta Derm Venereol	Aim of the study different to the objective of this SR
96	Comparative performance of QuantiFERON(®)-TB Gold IT versus tuberculin skin test among contact investigations for latent tuberculosis infection].	2011	Delgado Naranjo J	Med Clin	The study assessed the production of IFN-g as part of the IGRA’s evaluation or that used cytokines/chemokines as diagnostic method for active TB or LTBI
97	Use of interferon-gamma release assay for latent tuberculosis infection screening in older adults exposed to tuberculosis in a nursing home.	2011	Katsenos S	J Am Geriatr Soc	The study assessed the production of IFN-g as part of the IGRA’s evaluation or that used cytokines/chemokines as diagnostic method for active TB or LTBI
98	Screening of immigrants in the UK for imported latent tuberculosis: amulticentre cohort study and cost-effectiveness analysis.	2011	Pareek M	Lancet Infect Dis	Aim of the study different to the objective of this SR
99	Risk factors associated with positive QuantiFERON-TB Gold In-Tube and tuberculin skin tests results in Zambia and South Africa.	2011	Shanaube K	PLoS One	Aim of the study different to the objective of this SR
100	Detection of latent tuberculosis infection in peritoneal dialysis patients: new methods].	2011	Palomar R	Nefrologia	Aim of the study different to the objective of this SR
101	Predictors of indeterminate IFN-γ release assay in screening for latent TB in inflammatory bowel diseases.	2011	Papay P	Eur J Clin Invest	Aim of the study different to the objective of this SR
102	Paradoxical exacerbation of tuberculosis after TNFα antagonist discontinuation: beware of immune reconstitution inflammatory syndrome.	2011	Rivoisy C	Joint Bone Spine	Descriptive study, case reports and series, and reviews
103	No influence of haemodialysis on interferon production in the QuantiFERON-TB Gold-In-Tube test.	2011	Hoogewerf M	J Nephrol	Aim of the study different to the objective of this SR
104	Low agreement between the T-SPOT®.TB assay and the tuberculin skin test among college students in China.	2011	Zhao J	Int J Tuberc Lung Dis	The study assessed the production of IFN-g as part of the IGRA’s evaluation or that used cytokines/chemokines as diagnostic method for active TB or LTBI
105	Cost effectiveness of interferon-gamma release assay for tuberculosis screening of rheumatoid arthritis patients prior to initiation of tumor necrosis factor-α antagonist therapy.	2010	Kowada A	Mol Diagn ther	Aim of the study different to the objective of this SR
106	identification of human T-cell responses to Mycobacterium tuberculosis resuscitation-promoting factors in long-term latently infected individuals.	2011	Commandeur S	Clin Vaccine Immunol	Aim of the study different to the objective of this SR
107	Interferon-inducible protein-10 as a marker to detect latent and active tuberculosis in rheumatoid arthritis.	2011	Chen DY	Int J Tuberc Lung Dis	Immunocompromised individuals or studies exclusively conducted in children
108	Concordance of a positive tuberculin skin test and an interferon gamma release assay in bacille Calmette-Guérin vaccinated persons.	2011	Mahan CS	Int J Tuberc Lung Dis	Aim of the study different to the objective of this SR
109	An evaluation of the tuberculin skin test for anti TNF alpha prophylaxis patients with ankylosing spondylitis and rheumatoid arthritis.	2010	Karkucak M	Bratisl Lek Listy	Aim of the study different to the objective of this SR
110	Diagnosis of latent tuberculosis infection in bacille Calmette-Guérin vaccinated subjects in China by interferon-gamma ELISpot assay.	2010	Zhang M	Int J Tuberc Lung Dis	The study assessed the production of IFN-g as part of the IGRA’s evaluation or that used cytokines/chemokines as diagnostic method for active TB or LTBI
111	IFN-γ response on T-cell based assays in HIV-infected patients for detection of tuberculosis infection.	2010	Latorre I	BMC Infect Dis	Immunocompromised individuals or studies exclusively conducted in children
112	Is the T-cell-based interferon-gamma releasing assay feasible for diagnosis of latent tuberculosis infection in an intermediate tuberculosis- burden country?	2010	Dilektasli AG	Jpn J Infect Dis	The study assessed the production of IFN-g as part of the IGRA’s evaluation or that used cytokines/chemokines as diagnostic method for active TB or LTBI
113	Clinical experience of QuantiFERON(®) -TB Gold testing in patients with psoriasis treated with tumour necrosis factor blockers in Taiwan.	2011	Chiu HY	Br J Dermatol	Aim of the study different to the objective of this SR
114	Latent tuberculosis detection by interferon γ release assay during pregnancy predicts active tuberculosis and mortality in human immunodeficiency virus type 1-infected women and their children.	2010	Jonnalagadda SR	J Infect Dis	Aim of the study different to the objective of this SR
115	QuantiFERON TB gold testing for tuberculosis screening in an inflammatory bowel disease cohort in the United States.	2011	Qumseya BJ	Inflamm Bowel Dis	Aim of the study different to the objective of this SR
116	Cost effectiveness of interferon-gamma release assay versus chest X-ray for tuberculosis screening of BCG-vaccinated elderly populations.	2010	Kowada A	Mol Diagn ther	Aim of the study different to the objective of this SR
117	A comparison of an interferon-gamma release assay and tuberculin skin test in refractory inflammatory disease patients screened for latent tuberculosis prior to the initiation of a first tumor necrosis factor α inhibitor.	2011	Kwakernaak	Clin Rheumatol	Aim of the study different to the objective of this SR
118	Factors impacting the results of interferon-γ release assay and tuberculin skin test in routine screening for latent tuberculosis in patients with inflammatory bowel diseases.	2011	Papay P	Inflamm Bowel Dis	Aim of the study different to the objective of this SR
119	High incidence of intolerance to tuberculosis chemoprophylaxis.	2012	Haroon M	Rheumatol Int	Aim of the study different to the objective of this SR
120	The relevance of diagnostic criteria for latent tuberculosis before initiation of TNF-alpha inhibitors in psoriasis patients].	2010	Goujon	Ann Dermatol Venereol	Language different to Spanish, English and Portuguese
121	High prevalence of latent tuberculosis infection in dialysis patients using the interferon-gamma release assay and tuberculin skin test.	2010	Lee SS	Clin J Am Soc Nephrol	Aim of the study different to the objective of this SR
122	Etanercept and infection - latent tuberculosis].	2010	González-Sixto B	Actas Demosifiliorg	Aim of the study different to the objective of this SR
123	Tuberculosis in rheumatoid arthritis patients: the difficulty in making the diagnosis of latent infection].	2010	Silva DG	J Bras Pneumol	Aim of the study different to the objective of this SR
124	Screening for latent tuberculosis infection in South Korean healthcare workers using a tuberculin skin test and whole blood interferon-gamma assay.	2010	Jong Lee K	Scand J Infect Dis	Aim of the study different to the objective of this SR
125	Interferon-γ release assay in people infected with immunodeficiency virus.	2011	Bua A	Clin Microbiol Infect	Aim of the study different to the objective of this SR
126	Clinical applicability of T-cell interferon-a release assay for tumour necrosis factor-a inhibitor therapy in severe psoriasis.	2011	Chiang YZ	Clin Exp Dermatol	Aim of the study different to the objective of this SR
127	Serial testing of interferon-gamma-release assays for the diagnosis of latent tuberculosis in hemodialysis patients.	2010	Chung WK	J Infect	Aim of the study different to the objective of this SR
128	Comparison of T-cell interferon-gamma release assays for Mycobacterium tuberculosis-specific antigens in patients with active and latent tuberculosis.	2010	Kobashi Y	Lung	The study assessed the production of IFN-g as part of the IGRA’s evaluation or that used cytokines/chemokines as diagnostic method for active TB or LTBI
129	Interferon-gamma releasing assay versus tuberculin skin testing for latent tuberculosis infection in targeted screening programs for high risk immigrants.	2010	Orlando G	Infection	Aim of the study different to the objective of this SR
130	NF-alpha antagonist therapy modify the tuberculin skin test response.	2011	Cagatay	Rheumatol Int	Aim of the study different to the objective of this SR
131	Cost-effectiveness of QuantiFERON-TB test vs. tuberculin skin test in the diagnosis of latent tuberculosis infection.	2010	Deuffic-Burban S	Int J Tuberc Lung Dis	Aim of the study different to the objective of this SR
132	Role of QuantiFERON-TB gold, interferon gamma inducible protein-10 and tuberculin skin test in active tuberculosis diagnosis.	2010	Syed Ahamed Kabeer B	PLoS One	Aim of the study different to the objective of this SR
133	Assessment of an Interferon-gamma release assay for the diagnosis of latent tuberculosis infection in haemodialysis patient.	2010	Hoffmann M	Swiss Med Wkly	Immunocompromised individuals or studies exclusively conducted in children
134	QuantiFERON-TB Gold In-Tube test (QFT-GIT) for the screening of latent tuberculosis in recent immigrants to Italy.	2009	Saracino A	New Microbiol	The study assessed the production of IFN-g as part of the IGRA’s evaluation or that used cytokines/chemokines as diagnostic method for active TB or LTBI
135	High numbers of interferon-gamma-producing T cells and low titers of anti-tuberculous glycolipid antibody in individuals with latent tuberculosis.	2010	Guio H	Tohoku J Exp Med	Aim of the study different to the objective of this SR
136	Performance of the tuberculin skin test and interferon-gamma release assay for detection of tuberculosis infection in immunocompromised patients in a BCG-vaccinated population.	2009	Kim EY	BMC Infect Dis	The study assessed the production of IFN-g as part of the IGRA’s evaluation or that used cytokines/chemokines as diagnostic method for active TB or LTBI
137	New tools for detecting latent tuberculosis infection: evaluation of RD1-specific long-term response.	2009	Butera O	BMC Infect Dis	The study assessed the production of IFN-g as part of the IGRA’s evaluation or that used cytokines/chemokines as diagnostic method for active TB or LTBI
138	Validity of interferon-γ-release assays for the diagnosis of latent tuberculosis in haemodialysis patients.	2010	Chung WK	Clin Microbiol Infect	Aim of the study different to the objective of this SR
139	Serial interferon-gamma release assays after rifampicin prophylaxis in a tuberculosis outbreak.	2010	Lee SH	Respir Med	Aim of the study different to the objective of this SR
140	QuantiFERON-TB Gold in the identification of latent tuberculosis infection in rheumatoid arthritis: a pilot study.	2009	Shovman O	Int J Tuberc Lung Dis	Aim of the study different to the objective of this SR
141	Interferon gamma release assays: principles and practice.	2010	Lalvani A	Enferm Infecc Microbiol Clin	Aim of the study different to the objective of this SR
142	Usefulness and limitations of QuantiFERON-TB Gold in Japanese rheumatoid arthritis patients: proposal to decrease the lower cutoff level for assessing latent tuberculosis infection.	2010	Maeda T	Mod Rheumatol	Aim of the study different to the objective of this SR
143	Utility of an interferon-gamma release assay for latent tuberculosis diagnosis in a case of bullous pemphigoid.	2009	Goodfellow A	J Cutan Med Surg	Descriptive study, case reports and series, and reviews
144	Positive conversion of tuberculin skin test and performance of interferon release assay to detect hidden tuberculosis infection during anti-tumor necrosis factor agent trial.	2009	Park JH	J Rheumatol	Aim of the study different to the objective of this SR
145	Evaluation of interferon-gamma release assays in the diagnosis of recent tuberculosis infection in health care workers.	2009	Casas I	PLoS One	The study assessed the production of IFN-g as part of the IGRA’s evaluation or that used cytokines/chemokines as diagnostic method for active TB or LTBI
146	Tuberculosis screening in patients with psoriasis before antitumour necrosis factor therapy: comparison of an interferon-gamma release assay vs. tuberculin skin test.	2009	Laffitte E	Br J Dermatol	Aim of the study different to the objective of this SR
147	Relationship of immunodiagnostic assays for tuberculosis and numbers of circulating CD4+ T-cells in HIV infection.	2010	Leidl L	Eur Respir J.	The study assessed the production of IFN-g as part of the IGRA’s evaluation or that used cytokines/chemokines as diagnostic method for active TB or LTBI
148	Evaluation of an interferon gamma assay in the diagnosis of latent tuberculosis infection in patients with rheumatoid arthritis.	2009	Marques CD	Rheumatol Int	Aim of the study different to the objective of this SR
149	The value of an immune response to Mycobacterium tuberculosis in patients with chronic posterior uveitis revisited: utility of the new IGRAs.	2010	Cordero-Coma M	Eye	The study assessed the production of IFN-g as part of the IGRA’s evaluation or that used cytokines/chemokines as diagnostic method for active TB or LTBI
150	Screening of tuberculosis by interferon-gamma assay before biologic therapy for rheumatoid arthritis.	2009	Murakami S	Tuberculosis	The study assessed the production of IFN-g as part of the IGRA’s evaluation or that used cytokines/chemokines as diagnostic method for active TB or LTBI
151	Comparison of interferon {gamma} release assays and conventional screening tests before tumour necrosis factor {alpha} blockade in patients with inflammatory arthritis.	2010	Martin J	Ann Rheum Dis	The study assessed the production of IFN-g as part of the IGRA’s evaluation or that used cytokines/chemokines as diagnostic method for active TB or LTBI
152	The serum angiotensin converting enzyme and lysozyme levels in patients with ocular involvement of autoimmune and infectious diseases.	2016	Sahin O	BMC Ophthalmol	Aim of the study different to the objective of this SR
153	PD­1 Expression and Cytokine Secretion Profiles of Mycobacterium tuberculosis­Specific CD4+ T­Cell Subsets; Potential Correlates of Containment in HIV­TB Co­Infection.	2016	Pollock KM	PLoS One	Immunocompromised individuals or studies exclusively conducted in children
154	Circulating Angiogenic Factors as Biomarkers of Disease Severity and Bacterial Burden in Pulmonary Tuberculosis.	2016	Kumar NP	PLoS One	Aim of the study different to the objective of this SR
155	Elevated expression of T­bet in mycobacterial antigen­specific CD4(+) T cells from patients with tuberculosis.	2015	Yang B	Cell Immunol	Aim of the study different to the objective of this SR
156	Assessment of CD27 expression as a tool for active and latent tuberculosis diagnosis.	2015	Petruccioli E	J Infect	The study assessed the production of IFN-g as part of the IGRA’s evaluation or that used cytokines/chemokines as diagnostic method for active TB or LTBI
157	Differential Levels of Alpha­2­Macroglobulin, Haptoglobin and Sero­ Transferrin as Adjunct Markers for TB Diagnosis and Disease Progression in the Malnourished Tribal Population of Melghat, India.	2015	Bapat PR	PLoS One	Aim of the study different to the objective of this SR
158	Profiling leucocyte subsets in tuberculosis­diabetes co­morbidity.	2015	Kumar NP	Immunology	Aim of the study different to the objective of this SR
159	Granzyme A as a potential biomarker of Mycobacterium tuberculosis infection and disease.	2015	Guggino G	Immunol Lett	Aim of the study different to the objective of this SR
160	Combinatorial Immunoprofiling in Latent Tuberculosis Infection. Toward Better Risk Stratification.	2015	Escalante P	Am J Respir Crit Care Med	Aim of the study different to the objective of this SR
161	IFN­γ/TNF­α ratio in response to immuno proteomically identified human T­cell antigens of Mycobacterium tuberculosis ­ The most suitable surrogate biomarker for latent TB infection.	2015	Prabhavathi M	J Infect	Aim of the study different to the objective of this SR
162	Differential expression of CD57 in antigen­reactive CD4+ T cells between active and latent tuberculosis infection.	2015	Lee JY	Clin Immunol	Aim of the study different to the objective of this SR
163	Screening toll­like receptor markers to predict latent tuberculosis infection and subsequent tuberculosis disease in a Chinese population.	2015	Wu L	BMC Med Genet	Aim of the study different to the objective of this SR
164	Biomarkers on patient T cells diagnose active tuberculosis and monitor treatment response.	2015	Adekambi T	J Clin Invest	Aim of the study different to the objective of this SR
165	Iron homeostasis and progression to pulmonary tuberculosis disease among household contacts.	2015	Minchella PA	Tuberculosis	Aim of the study different to the objective of this SR
166	Regulatory T­cell subsets in response to specific Mycobacterium tuberculosis antigens in vitro distinguish among individuals with different QTF and TST reactivity.	2015	Serrano CJ	Clin Immunol	Aim of the study different to the objective of this SR
167	A novel whole­blood miRNA signature for a rapid diagnosis of pulmonary tuberculosis.	2015	Latorre I	Eur Respir J.	The study assessed the production of IFN-g as part of the IGRA’s evaluation or that used cytokines/chemokines as diagnostic method for active TB or LTBI
168	Immunological consequences of intragenus conservation of Mycobacterium tuberculosis T­cell epitopes.	2015	Lindestam Arlehamn CS	Proc Natl Acad Sci U S A	Aim of the study different to the objective of this SR
169	IP­10 and MIG are compartmentalized at the site of disease during pleural and meningeal tuberculosis and are decreased after antituberculosis treatment	2014	Yang Q	Clin Vaccine Immunol	Aim of the study different to the objective of this SR
170	Circulating B­lymphocytes as potential biomarkers of tuberculosis infection activity.	2014	Sebina I	PLoS One	Aim of the study different to the objective of this SR
171	Transcriptional profile of tuberculosis antigen­specific T cells reveals novel multifunctional features.	2014	Arlehamn CL	J Immunol	Aim of the study different to the objective of this SR
172	Detection of Mycobacterium tuberculosis peptides in the exosomes of patients with active and latent M. tuberculosis infection using MRM­MS.	2014	Kruh-Garcia NA	PLoS One	Aim of the study different to the objective of this SR
173	Tuberculin skin test and interferon­gamma release assay values are associated with antimicrobial peptides expression in polymorphonuclear cells during latent tuberculous infection	2014	Castañeda-Delgado JE	Mem Inst Oswaldo Cruz	Aim of the study different to the objective of this SR
174	A proteomics approach to the identification of plasma biomarkers for latent tuberculosis infection.	2014	Zhang X	Diagn Microbiol Infect Dis	Aim of the study different to the objective of this SR
175	Analysis of Th1, Th17 and regulatory T cells in tuberculosis case contacts	2014	García Jacobo RE	Cell Immunol	Aim of the study different to the objective of this SR
176	The identification of tuberculosis biomarkers in human urine samples.	2014	Young BL	Eur Respir J.	Aim of the study different to the objective of this SR
177	Patients with tuberculosis disease have Mycobacterium tuberculosis­ specific CD8 T cells with a pro­apoptotic phenotype and impaired proliferative capacity, which is not restored following treatment.	2014	Day CL	PLoS One	Aim of the study different to the objective of this SR
178	T cell response to alpha crystallin and Mycobacterium tuberculosis specific antigens using ex­vivo elispot assay for detecting latent tuberculosis infection in Addis Ababa, Ethiopia.	2014	Mamo G	Ethiop Med J	Aim of the study different to the objective of this SR
179	Multi­functional flow cytometry analysis of CD4+ T cells as an immune biomarker for latent tuberculosis status in patients treated with tumour necrosis factor (TNF) antagonists.	2014	Sauzullo I	Clin Exp Immunol	The study assessed the production of IFN-g as part of the IGRA’s evaluation or that used cytokines/chemokines as diagnostic method for active TB or LTBI
180	Low levels of peripheral CD161++CD8+ mucosal associated invariant T (MAIT) cells are found in HIV and HIV/TB co­infection.	2013	Wong EB	PLoS One	Aim of the study different to the objective of this SR
181	Mycobacterial dormancy regulon protein Rv2623 as a novel biomarker for the diagnosis of latent and active tuberculous meningitis.	2013	Jain RK	Dis Markers	Aim of the study different to the objective of this SR
182	Serum lipids as biomarkers for therapeutic monitoring of latent tuberculosis infection.	2013	Albanna AS	Eur Respir J.	Aim of the study different to the objective of this SR
183	Soluble markers of the Toll­like receptor 4 pathway differentiate between active and latent tuberculosis and are associated with treatment responses.	2013	Feruglio SL	PLoS One	Aim of the study different to the objective of this SR
184	Monocyte signal transduction receptors in active and latent tuberculosis.	2013	Druszczynska M	Clin Dev Immunol	Aim of the study different to the objective of this SR
185	Memory T cells in latent Mycobacterium tuberculosis infection are directed against three antigenic islands and largely contained in a CXCR3+CCR6+ Th1 subset.	2013	Lindestam Arlehamn CS	PLoS Pathog	Aim of the study different to the objective of this SR
186	Apoptosis­associated biomarkers in tuberculosis: promising for diagnosis and prognosis prediction.	2013	Shu CC	BMC Infect Dis	Aim of the study different to the objective of this SR
187	Quantiferon TB Gold and tuberculin skin tests for the detection of latent tuberculosis infection in patients treated with tumour necrosis factor alpha blocking agents.	2013	Klein M	Clin Exp Rheumatol	The study assessed the production of IFN-g as part of the IGRA’s evaluation or that used cytokines/chemokines as diagnostic method for active TB or LTBI
188	Is mycobacterial heat shock protein 16 kDa, a marker of the dormant stage of Mycobacterium tuberculosis, a sarcoid antigen?	2013	Dubaniewicz A	Hum Immunol	Aim of the study different to the objective of this SR
189	Is isoniazid safe for liver transplant candidates with latent tuberculosis?	2012	Stucchi RS	Transplant Proc	Aim of the study different to the objective of this SR
190	The phenotypic distribution and functional profile of tuberculin­specific CD4 T­cells characterizes different stages of TB infection.	2012	Streitz M	Cytometry B Clin Cytom	Aim of the study different to the objective of this SR
191	BCG­specific IgG­secreting peripheral plasmablasts as a potential biomarker of active tuberculosis in HIV negative and HIV positive patients.	2013	Ashenafi S	Thorax	Aim of the study different to the objective of this SR
192	Distinct effector memory CD4+ T cell signatures in latent Mycobacterium tuberculosis infection, BCG vaccination and clinically resolved tuberculosis.	2012	Adekambi T	PLoS One	The study assessed the production of IFN-g as part of the IGRA’s evaluation or that used cytokines/chemokines as diagnostic method for active TB or LTBI
193	A novel assay detecting recall response to Mycobacterium tuberculosis: Comparison with existing assays.	2012	Hsu DC	Tuberculosis	Aim of the study different to the objective of this SR
194	Distinct clinical features in nontuberculous mycobacterial disease with or without latent tuberculosis infection	2012	Siddiqi UR	Tohoku J Exp Med	Aim of the study different to the objective of this SR
195	Abnormal spontaneous interleukin 8 receptor expression: a brief report of two cases.	2012	Antas P	Rev Soc Bras Med Trop	Descriptive study, case reports and series, and reviews
196	Prevalence of latent infection with Mycobacterium tuberculosis in Mazovia Region using interferon gamma release assay after stimulation with specific antigens ESAT­6 and CFP­10].	2011	Kus J.	Pneumonol Alergol Pol	Language different to Spanish, English and Portuguese
197	Differential expression of antimicrobial peptides in active and latent tuberculosis and its relationship with diabetes mellitus.	2011	Gonzalez-Curiel I	Hum Immunol	Aim of the study different to the objective of this SR
198	Diagnosis of tuberculosis infection using interferon­γ­based assays	2011	Santín Cerezales M	Enferm Infecc Microbiol Clin	The study assessed the production of IFN-g as part of the IGRA’s evaluation or that used cytokines/chemokines as diagnostic method for active TB or LTBI
199	Immunodiagnosis and biomarkers in tuberculosis.	2011	Guio H	Med Clin	Aim of the study different to the objective of this SR
200	Design of immunogenic peptides from Mycobacterium tuberculosis genes expressed during macrophage infection.	2009	Seghrouchni F	Tuberculosis	Aim of the study different to the objective of this SR
201	Mycobacterium tuberculosis secreted proteins as potential biomarkers for the diagnosis of active tuberculosis and latent tuberculosis infection	2015	Zhang C	J Clin Lab Anal	Aim of the study different to the objective of this SR
202	Gene expression profiling identifies candidate biomarkers for active and latent tuberculosis	2016	See SW	BMC Bioinformatics	Aim of the study different to the objective of this SR
203	Cytokine profile during latent and slowly progressive primary tuberculosis: a possible role for interleukin‐15 in mediating clinical disease	2006	F Abebe	Clin Exp Immunol	Study performed in animal model
204	Mycobacteria­specific cytokine responses detect tuberculosis infection and distinguish latent from active tuberculosis	2015	M Tebruegge	Am J Respir Crit Care Med	Immunocompromised individuals or studies exclusively conducted in children
205	Cytotoxic Marker Expression in Mycobacterium tuberculosis–Induced CD8+ T Cells in Individuals With Type 2 Diabetes and Latent Mycobacterium tuberculosis	2016	NP Kumar	J Infect Dis	Immunocompromised individuals or studies exclusively conducted in children
206	Coexistent malnutrition is associated with perturbations in systemic and antigen­specific cytokine responses in latent tuberculosis infection	2016	R Anuradha	Clin Vaccine Immunol	Aim of the study different to the objective of this SR
207	Evaluation of cytokine and chemokine response elicited by Rv2204c and Rv0753c to detect latent tuberculosis infection	2015	B Pathakumari,	Cytokine	Aim of the study different to the objective of this SR
208	Gene therapy based in antimicrobial peptides and proinflammatory cytokine prevents reactivation of experimental latent tuberculosis	2016	RE Octavio	Pathong	Study performed in animal model
209	in Adults with Latent and Active Tuberculosis from a High Endemic Country: And on the Role of the Cytotoxic Protein Granulysin in Childhood Tuberculosis	2010	H Müller	No aplica	Descriptive study, case reports and series, and reviews
210	Characterization of the cytokine profile in adults with latent and active tuberculosis from a high endemic country	2011	H Müller	No aplica	Descriptive study, case reports and series, and reviews
211	Mycobacterium tuberculosis­specific CD4+ T­cell response is increased, and Treg cells decreased, in anthelmintic­treated patients with latent TB.	2016	Toulza F	Eur J Immunol	Aim of the study different to the objective of this SR
212	Modulation of pro­ and anti­inflammatory cytokines in active and latent tuberculosis by coexistent Strongyloides stercoralis infection.	2015	George PJ	Tuberculosis	Aim of the study different to the objective of this SR
213	Interferon gamma release assays for monitoring the response to treatment for tuberculosis: A systematic review.	2015	Clifford V	Tuberculosis	Descriptive study, case reports and series, and reviews
214	Effect of isoniazid preventive therapy on immune responses to mycobacterium tuberculosis: an open label randomised, controlled, exploratory study.	2015	Biraro IA	BMC Infect Dis	Aim of the study different to the objective of this SR
215	Characterization of CD4/CD8+ αβ and Vγ2Vδ2+ T cells in HIV­negative individuals with different Mycobacterium tuberculosis infection statuses.	2015	Gao Y	Hum Immunol	Aim of the study different to the objective of this SR
216	Profile of interferon­gamma response to latency­associated and novel in vivo expressed antigens in a cohort of subjects recently exposed to Mycobacterium tuberculosis.	2015	Araujo LS	Tuberculosis	Aim of the study different to the objective of this SR
217	Cough Aerosol Cultures of Mycobacterium tuberculosis: Insights on TST / IGRA Discordance and Transmission Dynamics.	2015	Jones-López EC	PLoS One	Aim of the study different to the objective of this SR
218	CD4+ T cell polyfunctional profile in HIV­TB coinfection are similar between individuals with latent and active TB infection.	2015	Canaday DH	Tuberculosis	Immunocompromised individuals or studies exclusively conducted in children
219	Contribution of a heparin­binding haemagglutinin interferon­gamma release assay to the detection of Mycobacterium tuberculosis infection in HIV­ infected patients: comparison with the tuberculin skin test and the QuantiFERON­TB Gold In­tube.	2015	Wyndham-Thomas	BMC Infect Dis	The study assessed the production of IFN-g as part of the IGRA’s evaluation or that used cytokines/chemokines as diagnostic method for active TB or LTBI
220	Identification of novel Mycobacterium tuberculosis CD4 T­cell antigens via high throughput proteome screening.	2015	Nayak K	Tuberculosis	Aim of the study different to the objective of this SR
221	Biomarkers on patient T cells diagnose active tuberculosis and monitor treatment response.	2015	Adekambi T	J Clin Invest	Aim of the study different to the objective of this SR
222	Co­infection with Mycobacterium tuberculosis impairs HIV­Specific CD8+ and CD4+ T cell functionality.	2015	chetty S	PLoS One	Aim of the study different to the objective of this SR
223	Bifunctional T­cell­derived cytokines for the diagnosis of tuberculosis and treatment monitoring.	2014	Essone PN	Respiration	Aim of the study different to the objective of this SR
224	Comparison of interferon­γ release assay to two cut­off points of tuberculin skin test to detect latent Mycobacterium tuberculosis infection in primary health care workers.	2014	de Souza FM	PLoS One	Aim of the study different to the objective of this SR
225	Polyfunctional T­cells and effector memory phenotype are associated with active TB in HIV­infected patients.	2014	Chiacchio T	J Infect	Immunocompromised individuals or studies exclusively conducted in children
226	Tuberculin skin test reversion following isoniazid preventive therapy reflects diversity of immune response to primary Mycobacterium tuberculosis infection.	2014	Johnson DF	PLoS One	Aim of the study different to the objective of this SR
227	Patients with tuberculosis disease have Mycobacterium tuberculosis­ specific CD8 T cells with a pro­apoptotic phenotype and impaired proliferative capacity, which is not restored following treatment.	2014	Day CL	PLoS One	Aim of the study different to the objective of this SR
228	The use of Mycobacterium tuberculosis HspX and GlcB proteins to identify latent tuberculosis in rheumatoid arthritis patients.	2014	Silva BD	Mem Inst Oswaldo Cruz	Aim of the study different to the objective of this SR
229	T­SPOT.TB for detection of tuberculosis infection among hematological malignancy patients and hematopoietic stem cell transplant recipients.	2013	Qin LL	Asian Pac J Cancer Prev	The study assessed the production of IFN-g as part of the IGRA’s evaluation or that used cytokines/chemokines as diagnostic method for active TB or LTBI
230	The comparative value of quantiferonic test, neopterin and specific anti-tuberculosis antibodies in clinical diagnostic of tuberculosis of lungs	2013	Vasiliyeva YV	Klin Lab Diagn	Language different to Spanish, English and Portuguese
231	T­cell immunophenotyping distinguishes active from latent tuberculosis.	2013	Pollock KM	J Infect Dis	Immunocompromised individuals or studies exclusively conducted in children
232	Interferon­γ release assay for tuberculosis in patients with psoriasis treated with tumour necrosis factor antagonists: in vivo and in vitro analysis.	2013	Sauzullo I	Br J Dermatol	Immunocompromised individuals or studies exclusively conducted in children
233	Decreased expression of miR­21, miR­26a, miR­29a, and miR­142­3p in CD4+ T cells and peripheral blood from tuberculosis patients.	2013	Kleinsteuber K	PLoS One	Aim of the study different to the objective of this SR
234	The effects of rituximab therapy on released interferon­γ levels in the QuantiFERON assay among RA patients with different status of Mycobacterium tuberculosis infection.	2013	Chen YM	Rheumatology	Immunocompromised individuals or studies exclusively conducted in children
235	Diagnosis of latent tuberculosis infection in healthy young adults in a country with high tuberculosis burden and BCG vaccination at birth.	2013	Dagnew AF	BMC Res Notes	Aim of the study different to the objective of this SR
236	Frequent detection of anti­tubercular­glycolipid­IgG and ­IgA antibodies in healthcare workers with latent tuberculosis infection in the Philippines.	2012	Siddiqi UR	Clin Dev Immunol	The study assessed the production of IFN-g as part of the IGRA’s evaluation or that used cytokines/chemokines as diagnostic method for active TB or LTBI
237	A novel assay detecting recall response to Mycobacterium tuberculosis: Comparison with existing assays.	2012	Hsu DC	Tuberculosis	Aim of the study different to the objective of this SR
238	Consistency of Mycobacterium tuberculosis­specific interferon­gamma responses in HIV­1­infected women during pregnancy and postpartum.	2012	Jonnakagadda SR	Infect Dis Obstet Gynecol	Immunocompromised individuals or studies exclusively conducted in children
239	Increased frequencies of pulmonary regulatory T­cells in latent Mycobacterium tuberculosis infection.	2012	Herzmann C	Eur Respir J.	Aim of the study different to the objective of this SR
240	Association of the level of IFN­γ produced by T cells in response to Mycobacterium tuberculosis­specific antigens with the size of skin test indurations among individuals with latent tuberculosis in a highly tuberculosis­endemic setting.	2012	Legesse M	Int Immunol	Aim of the study different to the objective of this SR
241	T cell responses to DosR and Rpf proteins in actively and latently infected individuals from Colombia.	2012	Riaño F	Tuberculosis	Aim of the study different to the objective of this SR
242	Latent tuberculosis infection screening for laboratory personnel using interferon­γ release assay and tuberculin skin test in Korea: an intermediate incidence setting	2011	Moon HW	J Clin Lab Anal	Aim of the study different to the objective of this SR
243	Secondary leprosy infection in a patient with psoriasis during treatment with infliximab	2011	Teixeira FM	J Clin Rheumatol	Immunocompromised individuals or studies exclusively conducted in children
244	Double­ and monofunctional CD4+ and CD8+ T­cell responses to Mycobacterium tuberculosis DosR antigens and peptides in long­term latently infected individuals.	2011	Commandeur S	Eur J Immunol	Aim of the study different to the objective of this SR
245	Evaluation of an IFN­gamma assay in the diagnosis of latent tuberculosis in patients with psoriasis in a highly endemic setting.	2011	de Andrade Lima E	Acta Derm Venereol	Aim of the study different to the objective of this SR
246	Tuberculosis in special populations.	2011	Santín Cerezales M	Enfermedades Infecciosas y Microbiología Clínica	Descriptive study, case reports and series, and reviews
247	Detection and management of latent tuberculosis in liver transplant patients.	2011	Jafri SM	Liver Transpl	Aim of the study different to the objective of this SR
248	Ag85B­ESAT­6 adjuvanted with IC31® promotes strong and long­lived Mycobacterium tuberculosis specific T cell responses in volunteers with previous BCG vaccination or tuberculosis infection	2011	Van Dissel JT	Vaccine	Aim of the study different to the objective of this SR
249	Performance of QuantiFERON­TB Gold In­Tube (QFTGIT) for the diagnosis of Mycobacterium tuberculosis (Mtb) infection in Afar Pastoralists, Ethiopia.	2010	Legesse M	BMC Infect Dis	Aim of the study different to the objective of this SR
250	Time interval to conversion of interferon­gamma release assay after exposure to tuberculosis.	2011	Lee SW	Eur Respir J.	The study assessed the production of IFN-g as part of the IGRA’s evaluation or that used cytokines/chemokines as diagnostic method for active TB or LTBI
251	Questionable effectiveness of the QuantiFERON­TB Gold Test (Cellestis) as a screening tool in healthcare workers.	2010	Gandra S	Infect Control Hosp Epidemiol	Aim of the study different to the objective of this SR
252	QuantiFERON TB gold testing for tuberculosis screening in an inflammatory bowel disease cohort in the United States.	2011	Qumseya BJ	Inflamm Bowel Dis	Aim of the study different to the objective of this SR
253	High incidence of intolerance to tuberculosis chemoprophylaxis.	2012	Haroon M	Rheumatology	Aim of the study different to the objective of this SR
254	ELISPOT­IFN­gamma assay instead of tuberculin skin test for detecting latent Mycobacterium tuberculosis infection in rheumatic patients candidate to anti­TNF­alpha treatment.	2010	Girlanda S	Clin Rheumatol	Aim of the study different to the objective of this SR
255	Regulatory T cell frequency and modulation of IFN­gamma and IL­17 in active and latent tuberculosis.	2010	Marin ND	Tuberculosis	Aim of the study different to the objective of this SR
256	Comparison of tuberculin skin testing and T­SPOT.TB for diagnosis of latent and active tuberculosis.	2010	Simsek H	Jpn J Infect Dis	The study assessed the production of IFN-g as part of the IGRA’s evaluation or that used cytokines/chemokines as diagnostic method for active TB or LTBI
257	Strong purified protein derivative responses are associated with poor mycobacterium inhibition in latent TB.	2010	Kang JS	Eur Respir J.	The study assessed the production of IFN-g as part of the IGRA’s evaluation or that used cytokines/chemokines as diagnostic method for active TB or LTBI
258	Tuberculosis screening in Portuguese healthcare workers using the tuberculin skin test and the interferon­gamma release assay.	2009	Torres Costa J	Eur Respir J.	The study assessed the production of IFN-g as part of the IGRA’s evaluation or that used cytokines/chemokines as diagnostic method for active TB or LTBI
259	Response to Rv2628 latency antigen associates with cured tuberculosis and remote infection.	2010	Goletti D	Eur Respir J.	The study assessed the production of IFN-g as part of the IGRA’s evaluation or that used cytokines/chemokines as diagnostic method for active TB or LTBI
260	Comparison of the QuantiFERON­TB Gold In­Tube test with the tuberculin skin test for detecting latent tuberculosis infection in hemodialysis patients.	2010	Seyhan EC	Transplant Infect Dis	The study assessed the production of IFN-g as part of the IGRA’s evaluation or that used cytokines/chemokines as diagnostic method for active TB or LTBI
261	The role of chest CT scanning in TB outbreak investigation.	2010	Lee SW	Chest	Aim of the study different to the objective of this SR
262	Interferon gamma release assays: principles and practice.	2010	Lalvani A	Enferm Infecc Microbiol Clin	Aim of the study different to the objective of this SR
263	Attenuation of toll­like receptor expression and function in latent tuberculosis by coexistent filarial infection with restoration following antifilarial chemotherapy.	2009	Babu S	PLoS Negl Trop Dis	Aim of the study different to the objective of this SR
264	The value of an immune response to Mycobacterium tuberculosis in patients with chronic posterior uveitis revisited: utility of the new IGRAs.	2010	Cordero-Coma M	Eye	Aim of the study different to the objective of this SR
265	Type 2 diabetes ­ Tuberculosis co­morbidity is associated with diminished circulating levels of IL­20 subfamily of cytokines	2015	Kumar NP	Tuberculosis	Immunocompromised individuals or studies exclusively conducted in children
266	Viral hepatitis prevalence in patients with active and latent tuberculosis.	2015	Nooredinvand HA	World J Gastroenterol	Aim of the study different to the objective of this SR
267	The Association between active and passive smoking and latent tuberculosis infection in adults and children in the united states:results from NHANES.	2014	Mamo G	Ethiop	Aim of the study different to the objective of this SR
268	Discriminating active from latent tuberculosis in patients presenting to community clinics.	2010	Sandhu G	PLoS One	The study assessed the production of IFN-g as part of the IGRA’s evaluation or that used cytokines/chemokines as diagnostic method for active TB or LTBI
269	Comparative miRNA expression profiles in individuals with latent and active tuberculosis.	2011	Wang C	PLoS One	Aim of the study different to the objective of this SR
270	Coincident diabetes mellitus modulates Th1­, Th2­, and Th17­cell responses in latent tuberculosis in an IL­10­ and TGF­β­dependent manner.	2016	Kumar NP	Eur J Immunol	Immunocompromised individuals or studies exclusively conducted in children
271	Identifcation of differentially expressed long non­coding RNAs in CD4+ T cells response to latent tuberculosis infection.	2014	Yi Z	J Infect	Aim of the study different to the objective of this SR
272	Impact of cytotoxic and targeted antineoplastic drugs on the validity of the mitogen­induced interferon­23. gamma release assay for latent tuberculosis infection: results of a prospective trial at acomprehensive cancer cen	2014	Rodriguez GH	Scand J Infect Dis	Aim of the study different to the objective of this SR
273	Cytokine profiles in tuberculosis patients and healthy subjects in response to complex and single antigens of Mycobacterium tuberculosis	2006	Al-Attiyah R	FEMS Immunol Med Microbiol	Aim of the study different to the objective of this SR
274	Plasma cytokines and chemokines differentiate between active disease and non-active tuberculosis infection	2013	Mihret A	J Infect	Immunocompromised individuals or studies exclusively conducted in children
275	Improving T-cell assays for the diagnosis of latent TB infection: potential of a diagnostic test based on IP-10	2008	Lawson L	PLoS One	Immunocompromised individuals or studies exclusively conducted in children
276	Whole-blood flow- cytometric analysis of antigen-specific CD4 T-cell cytokine profiles distinguishes active tuberculosis from non-active states.	2011	Sester U	PLoS One	Aim of the study different to the objective of this SR
277	Multiple cytokines are released when blood from patients with tuberculosis is stimulated with Mycobacterium tuberculosis antigens	2010	Kellar KL	PLoS One	Aim of the study different to the objective of this SR
278	Differential cytokine/chemokines and KL-6 profiles in patients with different forms of tuberculosis.	2009	Djoba Siawaya	Cytokine	Immunocompromised individuals or studies exclusively conducted in children
279	Predictive value of a whole blood IFN-gamma assay for the development of active tuberculosis disease after recent infection with Mycobacterium tuberculosis	2008	Diel R	Am J Respir Crit Care Med	Aim of the study different to the objective of this SR
280	Evaluation of interferon-gamma, interferon-gamma-inducing cytokines, and interferon-gamma-inducible chemokines in tuberculous pleural effusions	2005	Okamoto M	J Lab Clin Med	Aim of the study different to the objective of this SR
281	Evaluating the potential of IP-10 and MCP-2 as biomarkers for the diagnosis of tuberculosis	2008	Ruhwald M	Eur Respir J.	Aim of the study different to the objective of this SR
282	Is IP-10 a better biomarker for active and latent tuberculosis in children than IFNgamma?	2008	Whittaker E	PLoS One	Immunocompromised individuals or studies exclusively conducted in children
283	Chemokine IP-10: an adjunct marker for latent tuberculosis infection in children	2009	Lighter J	Int J Tuberc Lung Dis	Immunocompromised individuals or studies exclusively conducted in children
284	IP-10 release assays in the diagnosis of tuberculosis infection: current status and future directions	2012	Ruhwald M	Expert Rev Mol Diagn	Descriptive study, case reports and series, and reviews
285	Interferon-inducible protein-10 as a marker to detect latent and active tuberculosis in rheumatoid arthritis	2011	Chen DY	Int J Tuberc Lung Dis	Immunocompromised individuals or studies exclusively conducted in children
286	Interferon-inducible protein-10 as a marker to detect latent and active tuberculosis in rheumatoid arthritis	2011	Chen DY	Int J Tuberc Lung Dis	Immunocompromised individuals or studies exclusively conducted in children
287	Interleukin-10 promotes Mycobacterium tuberculosis disease progression in CBA/J mice	2008	Beamer GL	J Immunol	Study performed in animal model
288	IFN-gamma-inducible protein 10 (IP-10; CXCL10)-deficient mice reveal a role for IP-10 in effector T cell generation and trafficking	2002	Dufour JH	J Immu-nol	Study performed in animal model
289	Chemokine IP-10: an adjunct marker for latent tuberculosis infection in children	2009	Lighter J	Int J Tuberc Lung Dis	Immunocompromised individuals or studies exclusively conducted in children
290	A comparison of interferon-gamma and IP-10 for the diagnosis of tuberculosis	2014	Holm LL	Pediatrics	Immunocompromised individuals or studies exclusively conducted in children
291	Is IP-10 a better biomarker for active and latent tuberculosis in children than IFNgamma?	2008	Whittaker E	PLOS One	Immunocompromised individuals or studies exclusively conducted in children
292	IFN-gamma, but not IP-10, MCP-2 or IL-2 response to RD1 selected peptides associates to active tuberculosis	2010	Goletti D	J. Infect	Aim of the study different to the objective of this SR
293	Different patterns of cytokines and chemokines combined with IFN-production reﬂect Mycobacterium tuberculosis infection and disease	2012	Yu Y	PLoS One	Aim of the study different to the objective of this SR
294	Interleukin-6: a potent biomarker of mycobacterial infection	2013	Singh PP	Springerplus	Aim of the study different to the objective of this SR
295	Immunological control of tuberculosis: role of tumour necrosis factor and more	2005	Stenger S.	Ann Rheum Dis	Immunocompromised individuals or studies exclusively conducted in children
296	Multicytokine detection improves latent tuberculosis diagnosis in health care workers	2012	Rubbo PA	J Clin Microbiol	The study assessed the production of IFN-g as part of the IGRA’s evaluation or that used cytokines/chemokines as diagnostic method for active TB or LTBI
297	Dynamic relationship between IFN-gamma and IL-2 proﬁle of Mycobacterium tuberculosis-speciﬁc T cells and antigen load.	2007	Dosanjh DP	J Immunol.	Aim of the study different to the objective of this SR
298	Healthy individuals that control a latent infection with Mycobacterium tuberculosis express high levels of Th1 cyto- kines and the IL-4 antagonist IL-4delta2.	2004	Demissie A	J Immunol	The study assessed the production of IFN-g as part of the IGRA’s evaluation or that used cytokines/chemokines as diagnostic method for active TB or LTBI
299	Differential cytokine/chemokines and KL-6 proﬁles in patients with different forms of tuberculosis	2009	Siawaya J	Cytokine	Aim of the study different to the objective of this SR
300	Evaluating the potential of IP-10 and MCP-2 as biomarkers for the diagnosis of tuberculosis	2008	Ruhwald M.	Eur RespirJ	The study assessed the production of IFN-g as part of the IGRA’s evaluation or that used cytokines/chemokines as diagnostic method for active TB or LTBI
301	Biomarkers of latent TB infection	2009	Ruhwald .M	Expert Rev Respir Med	Descriptive study, case reports and series, and reviews
302	Host markers in QuantiFERON supernatants differentiate active TB from latent TB infection: preliminary report	2009	Chegou NN	BMC Pulm Med	The study assessed the production of IFN-g as part of the IGRA’s evaluation or that used cytokines/chemokines as diagnostic method for active TB or LTBI
303	Improving T-cell assays for the diagnosis of latent TB infection: potential of a diagnostic test based on IP-10	2008	Ruhwald M	PLoS One	Aim of the study different to the objective of this SR
304	Immunological biomarkers of tuberculosis	2011	Walzl G	Nat. Rev. Immunol	Descriptive study, case reports and series, and reviews
305	Novel biomarkers distinguishing active tuberculosis from latent infection identified by gene expression profile of peripheral blood mononuclear cells	2011	Lu C.	PLoS One	The study assessed the production of IFN-g as part of the IGRA’s evaluation or that used cytokines/chemokines as diagnostic method for active TB or LTBI
306	Exploratory study on plasma immunomodulator and antibody profiles in tuberculosis patients	2013	Ravindran R	Clin Vaccine Immunol	Aim of the study different to the objective of this SR
307	γδ T­cell function is inhibited in end­stage renal disease and impacted by latent tuberculosis infection.	2017	Juno JA	Kidney Int	The study population was with advanced kidney disease
308	IL­21­dependent expansion of memory­like NK cells enhances protective immune responses against Mycobacterium tuberculosis.	2017	Venkatasubramanian S	Mucosal Immunol	Aim of the study different to the objective of this SR
309	Application of ImmunoScore Model for the Differentiation between Active Tuberculosis and Latent Tuberculosis Infection as Well as Monitoring Anti­tuberculosis Therapy	2017	Zhou Y.	Front Cell Infect Microbiol	Aim of the study different to the objective of this SR
310	Cost­effectiveness analysis of strategies using new immunological diagnostic tests of latent tuberculosis infection before TNF­blockers therapy	2018	Freud R.	Presse Med	Aim of the study different to the objective of this SR
311	Impaired IFN­α­mediated signal in dendritic cells differentiates active from latent tuberculosis	2018	Parlato S.	PLoS One	Aim of the study different to the objective of this SR
312	Use of IFN­γ and IP­10 detection in the diagnosis of latent tuberculosis infection in patients with inflammatory rheumatic diseases	2017	Villar­Hernández R	J. Infect	The study population had inflammatory rheumatic diseases
313	Prediabetes is associated with the modulation of antigen­ specific Th1/Tc1 and Th17/Tc17 responses in latent Mycobacterium tuberculosis infection	2017	Kumar NP	PLoS One	Aim of the study different to the objective of this SR
314	Unaffected reaction level in tuberculin skin test by long­term therapy with tumor necrosis factor inhibitors for rheumatoid arthritis	2017	Yamamoto	Int J. Rheum Dis	The study population had rheumatoid arthritis
315	Tuberculosis screening among HIV­infected patients: tuberculin skin test vs. interferon­gamma release assay	2017	Adams JW	AIDS Care	Aim of the study different to the objective of this SR
316	Early Tuberculin Skin Test for the Diagnosis of Latent Tuberculosis Infection in Patients with Inflammatory Bowel Disease.	2017	Taxonera C.	J. Chrohns Colitis	The study population had patients with Inflammatory Bowel Disease
317	Efficacy of Treatment for Latent Tuberculosis in Patients Undergoing Treatment with a Tumor Necrosis Factor Antagonist	2017	Lee J.	Ann Thorac Soc	Aim of the study different to the objective of this SR
318	Mycobacteria­specific cytokine responses as correlates of treatment response inactive and latent tuberculosis	2017	Clifford V.	J. Infect	Aim of the study different to the objective of this SR
319	Anthelmintic therapy modifies the systemic and mycobacterial­antigen­stimulated cytokine profile in helminth­latent Mycobacterium tuberculosis co­infection	2017	Rajamanickam Anuradha	Infect Immun	Aim of the study different to the objective of this SR
320	Evaluation of cytokine responses against novel Mtb antigens as diagnostic markers for TB disease. J Infect. 2016 ep;73(3):219–30	2016	Awoniyi DO	TB disease	Immunocompromised individuals or studies exclusively conducted in children
321	Potential novel markers to discriminate between active and latent tuberculosis infection in Chinese individuals.	2016	Bai XJ	Comp Immunol Microbiol Infect Dis	Aim of the study different to the objective of this SR
322	Neutrophil extracellular trap (NET) levels in human plasma are associated with active TB	2017	Schechter MC	PLoS One	Aim of the study different to the objective of this SR
323	IP-10, MCP-1, MCP-2, MCP-3, and IL-1RA hold promise as biomarkers for infection with M. tuberculosis in a whole blood based T-cell assay	2009	Ruhwald M	BMC Res Notes	Aim of the study different to the objective of this SR
324	IL-10 Dependent Suppression of Type 1, Type 2 and Type 17 Cytokines in Active Pulmonary Tuberculosis	2013	Kumar NP	PLoS One	Population of study : TB lymphadenitits
325	S100A8/A9 proteins mediate neutrophilic inflammation and lung pathology during tuberculosis	2013	Gopal R	Am J Respir Crit Care Med	Aim of the study different to the objective of this SR
326	Heme Oxygenase-1 Regulation of Matrix Metalloproteinase-1 Expression Underlies Distinct Disease Profiles in Tuberculosis	2015	Andrade BB	Journal of Immunology	Aim of the study different to the objective of this SR
327	Angiopoietins as biomarkers of disease severity and bacterial burden in pulmonary tuberculosis	2016	Kumar NP	INT J TUBERC LUNG DIS	Aim of the study different to the objective of this SR
328	Diminished plasma levels of common γ-chain cytokines in pulmonary tuberculosis and reversal following treatment	2017	Kumar NP	PLoS One	Aim of the study different to the objective of this SR
329	Diminished circulating plasma and elevated lymph node culture supernatant levels of IL-10 familycytokines in tuberculous lymphadenitis	2018	Kathamuthu GR	Cytokine	Aim of the study different to the objective of this SR
330	Tuberculous lymphadenitis is associated with altered levels of circulating angiogenic factors	2018	Kathamuthu GR	Int J Tuberc Lung Dis	Aim of the study different to the objective of this SR
331	Reduced systemic and mycobacterial antigen-stimulated concentrations of IL-1β and IL-18 in tuberculous lymphadenitis	2017	Kathamuthu GR	Cytokine	Aim of the study different to the objective of this SR

## Sheet: S3-Cohort QC
	Selection				Comparability		Outcome			TOTAL (in asterisks)	QUALITY	Declaration of Conflict of Interest	Bias
Author	1. Representativeness of the exposed cohort	2. Selection of the non exposed cohort	3. Ascertainment of exposure	4. Demonstration that outcome of interest was not present at start of study	1. Comparability of cohorts on the basis of the design or analysis		1. Assessment of outcome	2. Was follow-up long enough for outcomes to occur	3. Adequacy of follow up of cohorts
Yun-Gyoung Hur, 2013	b.Somewhat representative of the average in the community*	a.Drawn from the same community as the exposed cohort*	a.Secure record (eg surgical records)*	a.Yes*	a.Study controls for (select the most important factor)*	b. no matching or adjustment at all	a.Independent blind assessment*	a.Yes (select an adequate follow up period for outcome of interest)*	d.No statement	7	High	Yes	Unidentified
Mulugeta Belay, 2015	b.Somewhat representative of the average in the community*	a.Drawn from the same community as the exposed cohort*	a.Secure record (eg surgical records)*	a.Yes*	a.Study controls for (select the most important factor)*	b. no matching or adjustment at all	a.Independent blind assessment*	a.Yes (select an adequate follow up period for outcome of interest)*	a.Complete follow up - all subjects accounted for*	8	High	Yes	Unidentified

## Sheet: S4-Cross-sectiona QC
Author	1.Was the research question or objective in this paper clearly stated?	2.Was the study population clearly specified and defined?	3.Was the participation rate of eligible persons at least 50%?	4.Were all the subjects selected or recruited from the same or similar populations (including the same time period)? Were inclusion and exclusion criteria for being in the study prespecified and applied uniformly to all participants?	5.Was a sample size justification, power description, or variance and effect estimates provided?	6.Were the exposure measures (independent variables) clearly defined, valid, reliable, and implemented consistently across all study participants?	7.Were the outcome measures (dependent variables) clearly defined, valid, reliable, and implemented consistently across all study participants?	8.Was loss to follow-up after baseline 20% or less?	9.Were key potential confounding variables measured and adjusted statistically for their impact on the relationship between exposure(s) and outcome(s)?	TOTAL (in answers "Yes")	QUALITY	Declaration of Conflict of Interest	Bias
Zeev T. Handzel, 2007	a.Yes	a.Yes	c.Cannot determine	b.No	b.No	a.Yes	a.Yes	a.Yes	b.No	5	Fair	No	Measurement: different cytokine measurement kits
Novel N. Chegou, 2009	a.Yes	a.Yes	c.Cannot determine	a.Yes	b.No	a.Yes	a.Yes	a.Yes	b.No	6	Fair	Yes	Selection: No booster applied
R. Biselli, 2010	a.Yes	a.Yes	c.Cannot determine	a.Yes	b.No	a.Yes	a.Yes	a.Yes	b.No	6	Fair	Yes	Selection: No booster applied
Jayne S. Sutherland, 2010	b.No	a.Yes	c.Cannot determine	b.No	b.No	a.Yes	a.Yes	a.Yes	a.Yes	5	Fair	Yes	Measurement: The reported cytokine values do not discriminate between MTB and M. africanum. Selection: No booster applied
Subash Babu, 2010	a.Yes	a.Yes	c.Cannot determine	a.Yes	b.No	a.Yes	a.Yes	a.Yes	b.No	6	Fair	Yes	Selection: No booster applied
Marc Frahm, 2011	a.Yes	a.Yes	c.Cannot determine	b.No	b.No	a.Yes	a.Yes	a.Yes	c.Cannot determine	5	Fair	No	Selection: ambieguedad in selection of groups TB and LTBI
Ji Young Hong, 2012	a.Yes	a.Yes	c.Cannot determine	a.Yes	b.No	a.Yes	a.Yes	a.Yes	b.No	6	Fair	Yes	Selection: No booster applied
S. Y. Kim, 2012	a.Yes	a.Yes	c.Cannot determine	a.Yes	b.No	a.Yes	a.Yes	a.Yes	b.No	6	Fair	Yes	Selection: No booster applied
Pierre-Alain Rubbo, 2012	a.Yes	a.Yes	c.Cannot determine	c.Cannot determine	b.No	a.Yes	a.Yes	a.Yes	b.No	5	Fair	Yes	Measurement: Inconsistency between TST and Quantiferon. Selection: no booster applied
Sen Wang, 2012	a.Yes	a.Yes	c.Cannot determine	a.Yes	b.No	a.Yes	a.Yes	a.Yes	a.Yes	7	Good	Yes	Measurement: Ambiguity at the TST cut-off points. Selection: No booster applied
Yang Yu, 2012	a.Yes	a.Yes	c.Cannot determine	a.Yes	b.No	a.Yes	a.Yes	a.Yes	b.No	6	Fair	Yes	Measurement: different cytokine measurement kits
D. Anbarasu, 2013	a.Yes	b.No	c.Cannot determine	b.No	b.No	a.Yes	a.Yes	a.Yes	b.No	4	Fair	No	Selection: No booster applied
Ikaria Sauzullo, 2014	a.Yes	a.Yes	c.Cannot determine	a.Yes	b.No	a.Yes	a.Yes	a.Yes	b.No	6	Fair	No	Measurement: Do not measure IL-2 in patients with active TB. Selection: No booster applied
K. Kim, 2014	a.Yes	a.Yes	c.Cannot determine	c.Cannot determine	b.No	a.Yes	a.Yes	a.Yes	b.No	5	Fair	Yes	Selection: patients included with pulmonary and extrapulmonary TB. Selection: No booster applied
Babak Pourakbari, 2015	a.Yes	a.Yes	c.Cannot determine	a.Yes	b.No	a.Yes	a.Yes	a.Yes	b.No	6	Fair	Yes	Selection: No booster applied
Prachi R. Bapat, 2015	a.Yes	a.Yes	c.Cannot determine	a.Yes	b.No	a.Yes	a.Yes	a.Yes	a.Yes	7	Good	No	Unidentified
Yun-Gyoung Hur, 2015	a.Yes	a.Yes	c.Cannot determine	a.Yes	b.No	a.Yes	a.Yes	a.Yes	b.No	6	Fair	No	Selection: No booster applied
M. Wei, 2015	b.No	a.Yes	c.Cannot determine	a.Yes	b.No	a.Yes	a.Yes	a.Yes	b.No	5	Fair	Yes	Unidentified
Ji Yeon Lee, 2015	a.Yes	a.Yes	c.Cannot determine	a.Yes	b.No	a.Yes	a.Yes	c.Cannot determine	b.No	5	Fair	Yes	Unidentified
Sunghyun Kim, 2015	a.Yes	a.Yes	c.Cannot determine	a.Yes	b.No	a.Yes	a.Yes	a.Yes	b.No	6	Fair	Yes	Selection: No booster applied
Jing Wu, 2017	b.No	a.Yes	c.Cannot determine	b.No	b.No	a.Yes	a.Yes	a.Yes	b.No	4	Fair	Yes	Selection: mix of ages, children and adults may have differences. Selection: No booster
Miguel Santin, 2016	a.Yes	a.Yes	a.Yes	a.Yes	a.Yes	a.Yes	a.Yes	a.Yes	b.No	8	Good	Yes	Selection: patients included with pulmonary and extrapulmonary TB
R. Kamakia, 2017	a.Yes	a.Yes	c.Cannot determine	a.Yes	b.No	a.Yes	a.Yes	a.Yes	b.No	6	Fair	Yes	Unidentified
Eun-Jeong Won, 2017	a.Yes	a.Yes	c.Cannot determine	a.Yes	b.No	a.Yes	a.Yes	a.Yes	b.No	6	Fair	Yes	Unidentified
La Manna MP, 2018	a.Yes	a.Yes	c.Cannot determine	a.Yes	b.No	a.Yes	a.Yes	c.Cannot determine	b.No	5	Fair	Yes	Selection: No booster was applied, although the selection was made by IGRAs as well
Arrollo L, 2018	a.Yes	a.Yes	c.Cannot determine	a.Yes	b.No	a.Yes	a.Yes	a.Yes	a.Yes	7	Good	Yes	Unidentified
Ditthawat Nonghanphithak, 2017	a.Yes	a.Yes	c.Cannot determine	a.Yes	b.No	a.Yes	a.Yes	a.Yes	b.No	6	Fair	Yes	Unidentified
Novel N. Chegou, 2012	a.Yes	a.Yes	a.Yes	a.Yes	b.No	a.Yes	a.Yes	a.Yes	b.No	7	Good	Yes	Selection: No booster applied
Yun Hee Jeong, 2014	a.Yes	a.Yes	c.Cannot determine	a.Yes	b.No	a.Yes	a.Yes	a.Yes	b.No	6	Fair	No	Selection: No booster applied, LTBI group was older thant the others groups.
F.A. Zambuzi, 2016	a.Yes	a.Yes	c.Cannot determine	a.Yes	b.No	a.Yes	a.Yes	a.Yes	b.No	6	Fair	Yes	Selection: No booster applied
Ida Wergeland, 2016	a.Yes	a.Yes	c.Cannot determine	a.Yes	b.No	a.Yes	a.Yes	a.Yes	b.No	6	Fair	Yes	Selection: patients included with pulmonary and extrapulmonary TB
Tao Chen, 2016	a.Yes	b.No	c.Cannot determine	a.Yes	b.No	a.Yes	a.Yes	a.Yes	b.No	5	Fair	Yes	Selection: No booster applied
Xiangyang Yao, 2017	a.Yes	a.Yes	c.Cannot determine	a.Yes	b.No	a.Yes	a.Yes	a.Yes	b.No	6	Fair	Yes	Unidentified
Mayer-Barber, 2014	b.No	a.Yes	c.Cannot determine	b.No	b.No	a.Yes	a.Yes	a.Yes	a.Yes	5	Fair	Yes	Selection: No booster applied

## Sheet: S5-Cytokine funtion
Immune factors, production cell, and effect found in the systematic review			S5 Adapted from 1-29. (See references S5)
Latent TB	Production cell	Diana cell and effect
IL-1 (α and β)	Macrophages, dendritic cells, fibroblasts, endothelial cells, keratinocytes, hepatocytes	Endothelial cells; activation (inflammation, coagulation) Hypothalamus: Fever Liver: synthesis of acute phase proteins
IL-5	T-lymphocytes CD4+ (Th2)	Eosinophils: activation, higher generation. B lymphocytes: proliferation
IL-17F	T-lymphocytes	Endothelial cells: increased production of chemokines. Macrophages: increased production of chemokines and cytokines
CCL20 (MIP-3α)	Dendritic cells, effector/memory CD8+ and CD4+ T cells, and interleukin-17 (IL-17) producing T cells (TH17).	Chemoattractant of lymphocytes and neutrophils, but not monocytes. CCL20 inhibits proliferation of myeloid progenitors in colony formation assays. It may be involved in formation and function of the mucosal lymphoid tissues by attracting lymphocytes and dendritic cells towards epithelial cells.
ICAM-1	Expressed on the surface of the endothelial cells, platelets, neutrophils and various other leukocyte subsets, fibroblasts, epithelial cells, pericytes and various other cell types	Activation of T cells. Also, might function as cell-surface receptor, capable of initiating intracellular signaling. Involved in neutrophil migration to peri-epithelial sites
Active TB	Production cell	Diana cell and effect
IL-7	Fibroblasts, bone marrow, Stromal cells	Immature lymphoid progenitors: proliferation of early progenitors of T and B lymphocytes. Lymphocytes T: survival of virgin lymphocytes and memory
IL-22	T-lymphocytes	Epithelial cells: production of defensins, increased barrier function. Hepatocytes: survival
IL-2R	Area of activated T cells and natural killer	IL-2 Receptor
VEGF-A	Macrophages, platelets, keratinocytes, and renal mesangial cells	Mitogen, bone formation, hematopoiesis, wound healing,and development. Essential growth factor for vascular endothelial cells
CSF3	Macrophages, fibroblasts, endothelial cells	Impaired hematopoietic progenitors: induced granulocyte maturation
CSF2	Macrophages, fibroblasts, endothelial cells	Functions to control the survival, growth, differentiation and effector function of tissues and cells. Diferenciacion de celulas dendriticas
TGF-α	T lymphocytes (especially Treg), macrophages, other cell types	T lymphocytes: inhibition of proliferation and effector functions; differentiation of Th17 and Treg
		B-lymphocytes: inhibition of proliferation; production of IgA
		Macrophages; inhibition of activation.
		Angiogenic factors
TGF-β1		Fibroblasts: Higher synthesis of collagen
TNF-β (Lymphotoxin α)	CD4 and CD8 T cells, B cells, and notably, lymphoid tissue inducer (LTi) cells	Regulates lymphoid organs in ontogeny by its production by lymphoid tissue inducer cells
INF-α	Dendritic cells, Macrophages,	IFN-α acts as inducer for the differentiation/activation of dendritic cells. IFN-I is crucial in linking innate and adaptive immunity. NK activation
PDGF	Platelets, endothelial cells, placenta	Functions related to paracrine growth factors. Is a potent mitogen for a variety of cell types
CCL1 (I-309)	T-lymphocytes	Attracts monocytes, NK cells, immature B cells and dendritic cells by interacting with a cell surface
		Chemokine receptor CCR8.
CCL3 (MIP-1α)	NK cells	Induce chemotactic mobilization of monocyte-lineage cells and lymphocytes into inflammatory tissues. CCL3 also regulates the proliferation of hematopoietic stem/progenitor cells (HSPCs) in the bone marrow
CCL7 (MCP-3)	Monocytes, macrophages	Chemotactic cytokine that specifically direct multipotent stem cell and progenitor cell migration to contribute to tissue regeneration. CCL7 recruit monocytes to sites of injury and mediate local inflammatory responses
CCL8 (MCP-2)	Monocytes, macrophages	Chemoattractant for monocytes, lymphocytes, basophils and eosinophils.
		Important to inflammatory host responses and is found in the highest concentration in the small intestine and peripheral blood cells.
CCL21 (6Ckine)	Secondary lymphoid-tissue	Influences lymphocyte homing to secondary lymphoid organs, integrin-mediated lymphocyte adhesion, and may act via the EBI1 ligand chemokine (ELC) receptor, CCR7. Chemoattractant for thymocytes and activated T cells. CCL21 is a known receptor for small inducible cytokine A19 (another member of the cytokine family).
CXCL11 (I-TAC)	Peripheral blood leukocytes, pancreas and liver astrocytes	Chemoattractant for interleukin-activated T cells but not unstimulated T cells, neutrophils or monocytes. Induces calcium release in activated T cells. Induced by IFN gamma and IFN beta.
LXA4	Intracellular biosynthesis depends on cell–cell associations by a process known as transcellular biosynthesis. E.g neutrophil–platelet interaction, interactions between leukocytes and mucosal surfaces, and intracellular pathogen and phagocyte	Inhibits the production of inflammatory cytokines by epithelial cell lines in response to TNFα and LPS, while it simulates the expression of the anti-inflammatory cytokine IL-10.32 In DCs, LXA4/ATL activates the suppressor of cytokine signaling (SOCS)-2 and in T cells, LXA4 attenuates TNFα release by impairing ERK signaling.
PGE2	Synthesized by many cells and tissues throughout the body	Depending upon context, PGE2 exerts homeostatic, inflammatory, or in some cases anti-inflammatory effects
sCD163	Largely expressed on monocytes/macrophages and neutrophils. It can be secreted as well.	sCD163 has several roles as an extracellular sensor for bacteria and modulator of immunological responses.
sCD14	Macrophages, dendritic cells, monocytes and granulocytes	sCD14 joins to the LPS complex and the protein LPS linker; required for activation of the macrophage induced by LPS
PGF2α	Synthesized by adipocytes and many cells and tissues throughout the body	It acts on platelets, endothelial cells, uterine cells and mast cells, among others. Is an important mediator of many biological functions, such as regulation of immune responses, blood pressure, gastrointestinal integrity, and fertility.
Fractalkine	Monocytes, macrophages, fibroblasts, endothelial, and dendritic cells.	Chemoattractive activity for monocytes, natural killer (NK) cells, and T cells
Not infected	Production cell	Diana cell and effect
Basic FGF	Several normal, tumor, and endothelial cells	Pathophysiological processes such as angiogenesis, wound healing, embryonic development, and endocrine secretion regulation
IL-23	Macrophages, dendritic cells	T-lymphocytes: maintenance of T lymphocytes producers of IL-17
LTBI, ATB or / and NI	Production cell	Diana cell and effect
IL-2	T-lymphocytes	T-lymphocytes: proliferation and differentiation in effector cells and memory; promote the development, survival and function of the regulatory T lymphocyte
		NK-lymphocytes: proliferation, activation
		B-lymphocytes: proliferation, antibody synthesis (at the laboratory)
IL-3	T-lymphocytes	Immature hematopoietic progenitors: induced maturation of all hematopoietic lines
IL-4	T-lymphocytes CD4+ (Th2), Mast cell	B-lymphocytes: change from isotype to IgE
		T-lymphocytes: differentiation and proliferation of Th2
		Macrophages; alternative activation and inhibition of classical activation by IFN-γ mediated
		Mast cells: proliferation (in the laboratory)
IL-6	Macrophages, endothelial cells, T-lymphocytes	Liver: synthesis of acute phase proteins
		B-lymphocytes: proliferation of antibody-producing cells
IL-7	Fibroblasts, bone marrow	Immature lymphoid progenitors: proliferation of early progenitors of T and B lymphocytes
	Stromal cells	Lymphocytes T: survival of virgin lymphocytes and memory
IL-9	CD4 + T-lymphocytes	Mast cells, B-lymphocytes, T-lymphocytes and tissue cells: survival and activation
IL-10	Macrophages, T-lymphocytes (especially, regulatory T-lymphocytes)	Macrophages, dendritic cells: inhibition of the expression of IL-12, costimulators and MHC class II
IL-12(p40)	Macrophages, cells	Lymphocytes T: ThI differentiation
	Dendritic	Lymphocytes NK and T lymphocytes: IFN-γ 'synthesis, increased cytotoxic activity
IL-13	CD4 + (Th2) T-lymphocytes, NK T- lymphocytes, mast cells	B-lymphocytes: change from isotype to IgE
		Epithelial cells: increased production of mucus
		Fibroblasts: Higher synthesis of collagen
		Macrophages: alternative activation
IL-15	Macrophages, others	NK-lymphocytes: proliferation
		T-lymphocytes: survival and proliferation of CD8 + lymphocytes
IL-17	T-lymphocytes	Endothelial cells: increased production of chemokines
		Macrophages: increased production of chemokines and cytokines
		Epithelial cells: production of GM-CSF and G-CSF
IL-17A	T-lymphocytes	Epithelial cells: production of GM-CSF and G-CSF. Macrophages: increased production of chemokines and cytokines
IL-1RA	Monocytes, macrophages, neutrophils	Receptor of IL-1
G-CSF	Macrophages, fibroblasts, endothelial cells	Impaired hematopoietic progenitors: induced granulocyte maturation
PDGF-BB	Platelets, endothelial cells	Functions related to paracrine growth factors. Is a potent mitogen for a variety of cell types
EGF	Submaxillary gland, Brunner's gland	Promotes the proliferation of mesenchymal, glial and epithelial cells
VEGF	Macrophages, platelets, keratinocytes, and renal mesangial cells	Mitogen, bone formation, hematopoiesis, wound healing,and development. Essential growth factor for vascular endothelial cells
sCD40L	B cells, too is expressed on various cells involved in atherogenesis, namely, endothelial cells, vascular smooth muscle cells, dendritic cells, monocytes, and macrophages	Activation of the CD40/sCD40L cascade results in secretion of proinflammatory and proatherogenic compounds
GM-CSF	T-lymphocytes, macrophages, macrophages, endothelial cells, fibroblasts	Immature and compromised progenitors, mature macrophages: induced maturation of granulocytes and monocytes, macrophage activation
CXCL8 (IL-8)	T-lymphocytes	Major mediator of inflammatory response, secreted by several cell types in response to inflammatory stimulus. A chemoattractant and also a potent angiogenic factor. Attracts neutrophils, basophils, and T-cells (but not monocytes). Strongly suggested role in the regulation of angiogenic activity in cancer and in idiopathic pulmonary fibrosis.
CXCL9 (MIG)	Monocytes, macrophages and endothelial cells	Selectively chemoattracts Th1 lymphocytes and also exerts other activities including inhibition of tumor growth, angiogenesis and inhibition of colony formation of hematopoietic progenitors.
CXCL10 (IP-10)	Produced by a wide variety of cell types ranging from neutrophils to hepatocytes, endothelial cells and keratinocytes.	Chemoattractant for CD4+ T cells and inhibits early normal and leukemic hematopoietic progenitor proliferation
CXCL12 (SDF-1α+β)	Stromal cells	A strong chemoattractant for lymphocytes and monocytes
CXCL13 (BCA-1)	T follicular helper cells, dendritic cells, and stromal cells	Preferentially promotes the migration of B lymphocytes (compared to T cells and macrophages), apparently by stimulating calcium influx into, and chemotaxis of, cells expressing Burkitt’s lymphoma receptor 1 (BLR1). It may therefore function in the homing of B lymphocytes to follicles.
CCL2 (MCP-1)	Endothelial, fibroblasts, epithelial, smooth muscle, mesangial, astrocytic, monocytic, and microglial cells	Chemoattractant for monocytes and basophils but not neutrophils or eosinophils. Augments monocyte anti-tumor activity.
CCL4 (MIP-1β)	T cells, B cells, and monocytes	Chemoattractant and adhesive effects on lymphocytes, preferentially attracting CD4+ T cells.
CCL5 (RANTES)	T-lymphocytes, macrophages, platelets, synovial fibroblasts, tubular epithelium	Chemoattractant for monocytes, memory T helper cells and eosinophils. It causes the release of histamine from basophils and activates eosinophils.
CCL8 (MCP-2)	Monocytes, macrophages	Chemoattractant for monocytes, lymphocytes, basophils and eosinophils.
		Important to inflammatory host responses and is found in the highest concentration in the small intestine and peripheral blood cells.
TNF-α	Macrophages, NK-lymphocytes, T-lymphocytes	Endothelial cells: activation (inflammation, coagulation)
		Neutrophils: activation
		Hypothalamus: Fever
		Liver: synthesis of acute phase proteins
		Muscle, fat: catabolism (cachexia)
INF-γ	T-lymphocytes (ThI, T CD8 + lymphocytes), NK-lymphocytes	Macrophages: classical activation (increase of microbicidal functions)
		B-lymphocytes: isotype change to opsonizing and fixating IgG subclasses of the complement (established in mice)
		T-lymphocytes: ThI differentiation
		Several cells: increased expression of MHC class 1 and II molecules, increased antigen processing and presentation to T lymphocytes
References S5
1. Rutz S, Eidenschenk C, Ouyang W. IL-22, not simply a Th17 cytokine. Immunol Rev. 2013;252:116–32. 2. Westermark B, Heldin CH. Platelet-derived growth factor. Structure, function and implications in normal and malignant cell growth. Acta Oncol Stockh Swed. 1993;32:101–5. 3. Andrae J, Gallini R, Betsholtz C. Role of platelet-derived growth factors in physiology and medicine. Genes Dev. 2008;22:1…

## Sheet: S6-Concentration of IP
	ACTIVE TB								Latent tuberculosis infection								No infected
SUBSTANCE	RNA from Antigen-stimulated whole blood cell pellets	Plasma samples from whole blood - Unstimulated	Plasma samples from whole blood - stimulated	PBMCs culture supernatant - Unstimulated	PBMCs culture supernatant - stimulated	Blood Culture supernatant	Serum	Plasma	RNA from Antigen-stimulated whole blood cell pellets	Plasma samples from whole blood - Unstimulated	Plasma samples from whole blood - stimulated	PBMCs culture supernatant - Unstimulated	PBMCs culture supernatant - stimulated	Blood Culture supernatant	Serum	Plasma	RNA from Antigen-stimulated whole blood cell pellets	Plasma samples from whole blood - Unstimulated	Plasma samples from whole blood - stimulated	PBMCs culture supernatant - Unstimulated	PBMCs culture supernatant - stimulated	Blood Culture supernatant	Serum	Plasma
IL-1
IL-1α			TBA/NI Fold change: 2.712148 [41] Median (IQR): 118.0 (0.0-235.4) pg/mL [25] Median (IQR): 24.1 (-15.4-76.1) pg/mL [52] Median (IQR): 37.4 (-0.9-88.1) pg/mL [52] Mean ± SD: 43.22±4.943 pg/mL [49] Mean ± SD: 39.21±5.73 pg/mL [49]					Median (IQR): 92.6 (27.0-153.6) pg/mL (group AFB neg) [34] Median (IQR): 67.2 (27.0-114.6) pg/mL (group AFB pos) [34] Median (IQR): 1.9 (1.8-2.0) pg/mL (group AFB neg) [34] Median (IQR): 1.8 (1.6-2.1) pg/mL (group AFB pos) [34]			LTBI/NI Fold change: 1.489933 [41] Median (IQR): 23.3 (0.0-158.5) pg/mL [21] Median (IQR): 24.1 (-15.4-76.1) pg/mL [52] Mean ± SD: 333.03±6.78 pg/mL [49]					Median (IQR): 114.4 (69.7-198.2) pg/mL [34] Median (IQR): 2.1 (1.7-2.1) pg/mL [34]			NI not stimulated /NI stimulated Fold change: 1.154403 [41] Median (IQR): -43.9 (-98.3-36.4) pg/mL [52] Mean ± SD: 5.299±2.755 pg/mL [49] Mean ± SD: 9.79±2.52 pg/mL [49]					Median (IQR): 158.0 (98.7-235.2) pg/mL [34] Median (IQR): 2.7 (2.1-3.4) pg/mL [34]
IL-1β			TBA/NI Fold change: 3.332547 [41] Median (IQR): 15.4 (-93.8-65.8) pg/mL [52] Median (IQR): 17.6 (-39.0-259.5) pg/mL [52]					Median (IQR): 2.0 (0.0-9.4) pg/mL (group AFB neg) [34] Median (IQR): 11.0 (3.6-19.4) pg/mL (group AFB pos) [34] Median (IQR): 12.5 (5.1-26.6) pg/mL (group AFB neg) [34] Median (IQR): 11.2 (3.9-20.4) pg/mL (group AFB pos) [34]			LTBI/NI Fold change: 7.421621 [41] Median (IQR): -37.7 (-93.2-129.3) pg/mL [52]					Median (IQR): 23.3 (4.0-71.9) pg/mL [34] Median (IQR): 0.9 (0.4-10.3) pg/mL [34]			NI not stimulated /NI stimulated Fold change: 1.81988 [41] Median (IQR): -39.6 (-241.4-122.1) pg/mL [52]					Median (IQR): 26.4 (20.7-86.0) pg/mL [34] Median (IQR): 11.2 (3.7-18.4) pg/mL [34]
IL-2		Median (IQR): 1.1 (0.0–4.4) pg/mL [29]	TBA/NI Fold change: 2.533989 [41] Median (IQR): 159.7 (62.2–393.7) pg/mL [29] Median (IQR): 106.6 (10.2-640.9) pg/mL [25] Median (IQR): 63.0 (17.0-331.0) pg/mL [48] Median (IQR): 115.0 (20.0-364.0) pg/mL [48] Median (IQR): 14.0 (0.0-79.0) pg/mL [48] Median (IQR): 99.6 (45.4-268.4) pg/mL [52] Median (IQR): 8.9 (0.6-20.5) pg/mL [52] Mean ± SD: 112.7±22.76 pg/mL [49] Mean ± SD: 205.3±44.26 pg/mL [49]		Median (IQR): 320.9 (117.5-851.8) pg/mL [50]					Median (IQR): 0 (0–1.9) pg/mL [29]	LTBI/NI Fold change: 1.500067 [41] Meidan (IQR): 283.2 (63.6–572.5) pg/mL [29] Median (IQR): 87 (69–140) pg/mL [28] Median (range): 170 (0–1146) IU/ml [35] Median (IQR): 164.0 (57.8-1778.0) pg/mL [25] Median (IQR): 199.0 (62.0-466.0) pg/mL [48] Median (IQR): 261.0 (81.0-853.0) pg/mL [48] Median (IQR): 52.0 (1.0-276.5) pg/mL [48] Median (IQR): 112.6 (46.4-215.6) pg/mL [52] Mean ± SD: 125.8±25.8 pg…		GM: 479.8 pg/ml [24] GM: 353.1 pg/ml [24] Median (IQR): 1111 (483.2-1738) pg/mL [50]					Median (IQR): 0.5 (0–3.2) pg/mL [29]	NI not stimulated /NI stimulated Fold change: 1.056429 [41] Median (IQR): 1.1 (0–4.7) pg/mL [29] Median (IQR): 10 (9–12) pg/mL [28] Median (range): 0 (0–0.08) IU/ml [35] Median (IQR): 0.0 (0.0-0.0) pg/mL [48] Median (IQR): 0.0 (0.0-0.0) pg/mL [48] Median (IQR): 0.0 (0.0-0.0) pg/mL [48] Median (IQR): 0.0 (0.0-0.4) pg/mL [52] Mean ± SD: 0.1289±0.05621 pg/mL [49] Mean ± SD:16.59±7.6 pg/mL [49]		GM: 296 pg/ml [24] GM: 392.6 pg/ml [24]
IL-3			Median (IQR): 0.2 (0.1-0.4) pg/mL [52] Median (IQR): 0.0 (0.0-0.0) pg/mL [52]								Median (IQR): 0.1 (0.1-0.3) pg/mL [52]								Median (IQR): 0.0 (0.0-0.0) pg/mL [52]
IL-4	mRNA expression, Median (range): 0.59 (0.00-4.22) [44]		Median (IQR): 1.9 (0.0-3.8) pg/mL [52] Median (IQR): -0.3 (-3.1-0.5) pg/mL [52]						mRNA expression, Median (range): 0.97 (0.00-7.00) [44]		Median (IQR): 271 (267–282) pg/mL [28] Median (IQR): 2.4 (0.7-3.7) pg/mL [52]						mRNA expression, Median (range): 0.50 (0.00-6.84) [44]		Median (IQ): 263 (261–269) pg/mL [28] Median (IQR): 0.5 (-2.1-1.3) pg/mL [52]
IL-5			Median (IQR): 0.2 (0.0-0.2) pg/mL [52] Median (IQR): 0.0 (-0.1-0.1) pg/mL [52]								Median (IQR): 15 (14–23) pg/mL [28] Median (IQR): 0.8 (0.3-4.0) pg/mL [52]								Media (IQR): 13 (13–15) pg/mL [28] Median (IQR): 0.0 (0.0-0.1) pg/mL [52]
IL-6			TBA/NI Fold change: 2.331404 [41] Median (IQR): -19.0 (-457.6-54.6) pg/mL [52] Median (IQR): 11.0 (-222.7-102.1) pg/mL [52]			Median (range): 6.6 (0–14) ng/mL [32] Median (range):7.8 (0–21.53) ng/mL [32]					LTBI/NI Fold change: 1.504092 [41] Median (IQR): 656 (430–800) pg/mL [28] Median: 507.6 pg/mL [39] Median (IQR): -12.3 (-175.7-202.5) pg/mL [52]			Media (range): 18 (0–26) ng/mL [32] Media (range): 19.74 (16.86– 22.74) ng/mL [32]					NI not stimulated /NI stimulated Fold change: 1.089638 [41] Median (IQR): 546 (335–937) pg/mL [28] Median: 230.9 pg/mL [39] Median (IQR): -149.2 (-542.8-79.3) pg/mL [52]
IL-7			TBA/NI Fold change: 2.081981 [41] Median (IQR): 0.1 (-2.5-3.1) pg/mL [52] Median (IQR): 1.3 (-1.8-2.3) pg/mL [52]			Median (range): 326 (275–480) pg/mL [32]					LTBI/NI Fold change: 1.333387 [41] Median (IQR): 133 (133–134) pg/mL [28] Median (IQR): 1.2 (-0.8-2.5) pg/mL [52]			Median (range): 326 (0–388) pg/mL [32]					NI not stimulated /NI stimulated Fold change: 1.106920 [41] Median (IQR): 133 (131–133) pg/mL [28] Median (IQR): -0.2 (-2.2-2.2) pg/mL [52]			Median (range): 326 (0–388) pg/mL [32]
IL-8		Mean ± SD: 2080±382.7 pg/mL [49] Mean ± SD: 2876±645.6 pg/mL [49] Median (IQR): -97.2 (-278.1-107.4) pg/mL [52] Median (IQR): 0.0 (-213.1-258.9) pg/mL [52] Mean ± SD: 4816±681 pg/mL [49] Mean ± SD: 4144±758.3 pg/mL [49]	TBA/NI Fold change: 2.278722 [41]			Median (range): 45 (8–62) ng/mL [32]				Mean ± SD: 863.8±161.0 pg/mL [49] Mean ± SD: 1506±545.9 pg/mL [49]	LTBI/NI Fold change: 1.420574 [41] Median (IQR): 0.0 (0.0-1110.0) pg/mL [52] Mean ± SD: 1254 ±380.9 pg/mL [49] Mean ± SD: 896.3±379.1 pg/mL [49]			Median (range): 35.59 (0–46.2) ng/mL [32]				Mean ± SD:1134±479.1 pg/mL [49]	NI not stimulated /NI stimulated Fold change: 1.200000 [41] Median (IQR): -68.4 (-598.9-0.0) pg/mL [52] Mean ± SD: 758.3±272.1 pg/mL [49]
IL-9						Median (range): 700 (400–1000) pg/mL [32]								Median (range): 500 (0–900) pg/mL [32]
IL-10	mRNA expression, Median (range): 0.18 (0.00-1.24) [44]		TBA/NI Fold change: 2.846600 [41] Median (IQR): -0.6 (-3.1-0.3) pg/mL [52] Median (IQR): 0.6 (-1.0-3.3) pg/mL [52]		Median (IQR): 135.7 (50.6-238.3) pg/mL [50]			Median (IQR): 151.9 (141.4-173.1) pg/mL (group AFB neg) [34] Median (IQR): 219.2 (150.0-516.0) pg/mL (group AFB pos) [34] Median (IQR): 16.3 (12.0-22.1) pg/mL (group AFB neg) [34] Median (IQR): 24.3 (17.8-31.2) pg/mL (group AFB pos) [34]	mRNA expression, Median (range):0.33 (0.00-1.75) [44]		LTBI/NI Fold change: 1.508316 [41] Median: 10.1 pg/mL [39] Median (IQR): 8 (6–15) pg/mL [28] Median (IQR): 0.3 (-0.1-0.5) pg/mL [52]		Median (IQR): 294.3 (144.2-409) pg/mL [50]			Median (IQR): 176.2 (154.7-207.1) pg/mL [34] Median (IQR): 20.9 (19.3-22.4) pg/mL [34]	mRNA expression, Median (range): 0.00 (0.00-13.57) [44]		NI not stimulated /NI stimulated Fold change: 1.200000 [41] Median (IQR): 7 (6–10) pg/mL [28] Median: 28.1 pg/mL [39] Median (IQR): -0.9 (-3.5-0.2) pg/mL [52]					Median (IQR): 18.4 (16.4-20.8) pg/mL [34] Median (IQR): 215.0 (173.8-269.9) pg/mL [34]
IL-12													GM: 28.99 pg/ml [24] GM: 15.43 pg/ml [24]								GM: 48.45 pg/ml [24] GM: 147.7 pg/ml [24]
IL-12 (p40/70)											Median (IQR): 848 pg/ml (783–894) pg/mL [28]								Median (IQR): 857 (823–892) pg/mL [28]
IL-12 (p40)			Median (IQR): 0.0 (-1.7-0.0) pg/mL [52] Median (IQR): 0.0 (0.0-0.2) pg/mL [52]			Median (IQR): 5.1 pg/ml [0–14] [23] Median (IQR): 643 [97–1476] pg/ml [23]					Median (IQR): 0.0 (-0.6-3.8) pg/mL [52]			Median (IQR): 14 [0–436] pg/ml [23] Median (IQR): 0 pg/ml [0–30] [23]					Median (IQR): 0.0 (-2.6-0.2) pg/mL [52]			Median (IQR): 125 [0–301] pg/ml [23] Median (IQR): 0 pg/ml [0–28] [23]
IL-12 (p70)			Median (IQR): 0.1 (-0.2-0.5) pg/mL [52] Median (IQR): -0.1 (-0.3-0.5) pg/mL [52]								Median (IQR): 0.2 (-0.3-0.4) pg/mL [52]								Median (IQR): -0.2 ( -0.4- -0.0) pg/mL [52]
IL-13			Median (IQR): 1.7 (0.0-13.4) pg/mL [52] Median (IQR): 0.0 (-0.2-0.0) pg/mL [52]			Median (IQR): 30 [12–45] pg/mL [23]					Median (IQR): 31 (24–56) pg/mL [28] Median (IQR): 7.2 (0.8-15.2) pg/mL [52]			Median (IQR): 24 [7–51] pg/ml [23]					Median (IQR): 28 (22–31) pg/mL [28] Median (IQR): 0.0 (-1.1-0.8) pg/mL [52]			Median (IQR): 8.5 [0-16] pg/mL [23]
IL-15			Median (IQR): 0.0 (-0.1-0.5) pg/mL [52] Median (IQR): 0.1 (-0.1-0.2) pg/mL [52]								Median (IQR): 205 (200–211) pg/mL [28] Median (IQR): 0.1 (-0.3-0.5) pg/mL [52]								Median (IQR): 50 (39–200) pg/mL [28] Median (IQR): 0.0 (-0.2-0.1) pg/mL [52]
IL-17			Median (IQR): 0.2 (-0.1-0.5) pg/mL [52] Median (IQR): 0.0 (-0.3-0.2) pg/mL [52]								Median (IQR): 208 (206–208) pg/mL [28] Median (IQR): 0.1 (-0.5-0.8) pg/mL [52]		GM: 105.2 pg/ml [24] GM: 186.3 pg/ ml [24]						Median (IQR): 208 (208–208) pg/mL [28] Median (IQR): -0.2 (-0.7-0.2) pg/mL [52]		GM: 823.7 pg/ml [24] GM: 937 pg/ml [24]
IL-17A
IL-17E
IL-17F
IL-18						Median (IQR): 0.5 [0–6.3] pg/mL [23]								Median (IQR): 0.5 [0–3.1] pg/mL [23]								Median (IQR): 0 [0–6.1] pg/mL [23]
IL-21
IL-22
IL-23													GM: 167.9 pg/ml [24] GM: 143.7 pg/ml [24]								GM: 920.9 pg/ml [24] GM: 1146 pg/ml [24]
IL- 25
IL-27
IL-28A
IL-31
IL-33
PDGF				Median (IQR): 2383 (1276-3770) pg/mL [50]		Median (range): 12 (7–15) ng/mL [32]						Median (IQR): 4496 (2981-6335) pg/mL [50]		Median (range): 7 (0–10) ng/mL [32]
PDGF-BB
PGF2α								Median (IQR): 0.06 (0.05-0.08) ng/mL (group AFB neg) [34] Median (IQR): 0.07 (0.05-0.09) ng/mL (group AFB pos) [34] Median (IQR): 0.06 (0.02-0.04) ng/mL (group AFB pos) [34] Median (IQR): 0.04 (0.03-0.24) ng/mL (group AFB pos) [34]								Median (IQR): 0.04 (0.03-0.05) ng/mL [34] Median (IQR): 0.2 (0.1-0.3) ng/mL [34]								Median (IQR): 0.05 (0.03-0.06) ng/mL [34] Median (IQR): 0.1 (0.1-0.2) ng/mL [34]
PGF2								Median (IQR): 0.5 (0.4-0.7) ng/mL (group AFB neg) [34] Median (IQR): 0.6 (0.4-0.8) ng/mL (group AFB pos) [34] Median (IQR): 1.7 (1.4-2.2) ng/mL (group AFB neg) [34] Median (IQR): 1.3 (0.8-2.1) ng/mL (group AFB pos) [34]								Median (IQR): 0.4 (0.3-0.6) ng/mL [34] Median (IQR): 1.1 (0.6-1.5) ng/mL [34]								Median (IQR): 0.4 (0.3-0.6) ng/mL [34] Median (IQR): 0.8 (0.6-1.1) ng/mL [34]
EGF		Median (IQR): 106.2 (40.8-148.9) pg/mL [25] Median (IQR): 115.5 (39.1-222.2) pg/mL [25]	Median (IQR): -44.9 (-116.1-0.44) pg/mL [25] Median (IQR): -21.2 (-44.2- -5.2) pg/mL [52] Median (IQR): -25.6 (-42.4- -13.0) pg/mL [52]							Median (IQR): 51.4 (23.4-141.3) pg/mL [25] Median (IQR): 34.5 (15.2-214.0) pg/mL [25]	Median (IQR): -7.0 (-48.9-274.0) pg/mL [25] Median (IQR): -8.5 (-23.2-6.9) pg/mL [52]								Median (IQR): -15.0 (-58.4-0.3) pg/mL [52]
FGF
TGF-α		Median (IQR): 28.5 (0.0-230.1) pg/mL [25]	Median (IQR): 22.2 (1.0-168.0) pg/mL [21]							Median (IQR): 6.2 (0.0-13.3) pg/mL [25]	Median (IQR): 13.4 (4.3-47.1) pg/mL [32]
TGF-β1			TBA/NI Fold change: 2.701383 [41]								LTBI/NI Fold change: 1.461406 [41]								NI not stimulated /NI stimulated Fold change: 1.208361 [41]
G-CSF			Median (IQR): -25.2 (-228.5-10.4) pg/mL [52] Median (IQR): -43.5 (-623.0-18.9) pg/mL [52] Mean ± SD: 22.47±4.182 pg/mL [49] Mean ± SD: 25.75±5.43 pg/mL [49]			Median (range): 1040 (430–1500) pg/mL [32]					Median (IQR): -8.5 (-51.2-52.2) pg/mL [52] Mean ± SD: 22.72±5.75 pg/mL [49]			Median (range): 500 (200– 1000) pg/mL [32]					Median (IQR): -69.6 (-185-17.6) pg/mL [52] Mean ± SD: 1.003±0.6085 pg/mL [49] Mean ± SD: 21.4 ±4.50 pg/mL [49]
CSF2			TBA/NI Fold change: 2.659569 [41]								LTBI/NI Fold change: 1.327780 [41]								NI not stimulated /NI stimulated Fold change: 1.121869 [41]
CSF3			TBA/NI Fold change: 2.316416 [41]								LTBI/NI Fold change: 1.444639 [41]								NI not stimulated /NI stimulated Fold change: 1.191019 [41]
GM-CSF			Median (IQR): 14.7 (2.8-58.8) pg/mL [52] Median (IQR): 0.0 (-9.5-7.3) pg/mL [52] Mean ± SD: 56.30±12.19 pg/mL [49] Mean ± SD: 103.1±25.74 pg/mL [49]								Median (IQR): 262 (210–266) pg/mL [28] Median (IQR): 41.0 (21.0-89.1) pg/mL [52] Mean ± SD: 34.27±7.14 pg/mL [49]								Median (IQR): 261 (54–263) pg/mL [28] Median (IQR): -1.2 (-14.6-4.5) pg/mL [52] Mean ± SD: 3.003±1.51 pg/mL [49] Mean ± SD: 15.82±3.51 pg/mL [49]
VEGF		Median (IQR): 83.4 (0.0-482.3) pg/mL [21] Median (IQR): 316.1 (202.1-432.3) pg/mL [52] Median (IQR): 249.3 (168.3-347.5) pg/mL [52]	Median (IQR): 0.0 (0.0-31.8) pg/mL [21] Median (IQR): -94.3 (-185.2- -19.1) pg/mL [52] Median (IQR): -47.2 (-103.5- -37.5) pg/mL [52] Mean ± SD: 142.6±28.44 pg/mL [49] Mean ± SD: 231.4±33.83 pg/mL [49]	Median (IQR): 939.8 (512.5-1256) pg/mL [50]						Median (IQR): 19.5 (0.0-415.8) pg/mL [25] Median (IQR): 173.0 (85.27-231.7) pg/mL [52] Mean ± SD: 22.21±9.207 pg/mL [49] Mean ± SD: 98.17±20.99 pg/mL [49]	Median (IQR): 36.3 (0.0-77.3) pg/mL [21] Median (IQR): -3.7 (-42.9-25.1) pg/mL [52]	Median (IQR): 583.7 (295.4-906.6) pg/mL [50]						Median (IQR): 175.8 (147.7-285.3) pg/mL [52]	Median (IQR): -22.1 (-43.7- -2.9) pg/mL [52] Mean ± SD: 102.6±48.53 pg/mL [49]
VEGF-A
SFC
β-NGF
basic FGF
INF-γ	mRNA expression, Median (range): 21.59 (0.08-173.20) [44]	Median (IQR): 4.3 (1.3-11.9) pg/mL [29] Median (IQR): 9 (3.0–15.3) pg/mL [26] Median (IQR): 3.5 (1.8-4.1) pg/mL (group AFB neg) [34] Median (IQR): 26.0 (9.1-49.4) pg/mL (group AFB pos) [34]	TBA/NI Fold change: 2.437919 [41] Median (IQR): 213.5 (59.3–454) pg/mL [29] Median (IQR): 352 (171.1–500) pg/mL [26] Median (IQR): 57.0 (0.0-646.3) pg/mL [21] Median (IQR): 99.3 (-216.4-699.8) pg/mL [21] Median (IQR): 2.77 (0.65-912) UI/mL [48] Median (IQR): 3.70 (0.59-8.53) U/mL [48] Median (IQR): 0.00 (-0.37-0.68) U/mL [48] Median (IQR): 342.1 (74.3-609.0) pg/mL [52] Median (IQR): 17.3 (3.0-28.…		Median (IQR): 1593 (1059-2560) pg/mL [50]	Median (IQR): 2923 [1101–5819] pg/mL [23]		Median (IQR): 26.0 (9.1-49.4) pg/mL (group AFB pos) [34] Median (IQR): 3.5 (1.8-4.1) pg/mL (group AFB neg [34] Median (IQR): 31.8 (27.8-36.0) pg/mL (group AFB neg) [34] Median (IQR): 33.9 (29.8-44.5) pg/mL (group AFB pos) [34]	mRNA expression, Median (range): 13.35 (0.83-104.35) [44]	Median (IQR): 4.6 (1.1–8.9) pg/mL [29] Median (IQR): 12.3 (4.1–36.1) pg/mL [26]	LTBI/NI Fold change: 2.161414 [41] Median (IQR): 158.3 (10.6–386.1) pg/mL [29] Median (IQR): 148.8 (96.9–500) pg/mL [26] Median (range): 3.18 (1.16–11.52) IU/ml [35] Median (IQR): 127.6 (38.6-1265.5) pg/mL [21] Median (IQR): 206.9 (8.7-6112.0) pg/mL [21] Median (IQR): 7.74 (1.85-12.69) UI/mL [48] Median (IQR): 6.56 (2.06-12.93) UI/mL [48] Median (IQR): 0.00 (-0.53-0.23) UI/mL [48] Median (IQR): 1…		GM: 608.2 pg/ml [24] GM: 669.1 pg/ml [24] Median (IQR): 2640 (1898-3430) pg/mL [50]	Median (IQR): 2043 [316– 7573] pg/mL [23]		Median (IQR): 7.9 (3.9-40.6) pg/mL [34] Median (IQR): 22.5 (22.0-24.9) pg/mL [34]	mRNA expression, Median (range): 1.75 (0.00-20.68) [44]	Median (IQR): 0 (0–1.5) pg/mL [29] Median (IQR): 1.3 (0–6.1) pg/mL [29] Median (IQR): 5 (3–11.3) pg/mL [26]	NI not stimulated /NI stimulated Fold change: 1.204253 [41] Median (IQR): 8.5 (2.6–19.5) pg/mL [26] Median (range): 0.02 (0-0.05) IU/ml [35] Median (IQR): 0.01 (0.00-0.09) U/mL [48] Median (IQR): 0.01 (0.00-0.10) U/mL [48] Median (IQR): 0.00 (0.00-0.10) U/mL [48] Median (IQR): -161.0 (-161.0-6.9) pg/mL [52]		GM: 418.5 pg/ml [24] GM: 835.7 pg/ml [24]	Median (IQR): 201 [46–496] pg/mL [23]		Median (IQR): 11.1 (3.4-15.8) pg/mL [34] Median (IQR): 20.6 (20.6-22.5) pg/mL [34]
IFN-α			Median (IQR): 22.7 (12.3-42.9) pg/mL [52] Median (IQR): 0.9 (-3.5-9.2) pg/mL [52]			Median (IQR): 476 [117–628] pg/mL[23]		Median (IQR): 84.6 (74.4-104.8) pg/mL (group AFB neg) [34] Median (IQR): 122.0 (96.0-148.4) pg/mL (group AFB pos) [34] Median (IQR): 10.4 (7.4-14.3) pg/mL (group AFB neg) [34] Median (IQR): 11.7 (7.9-17.7) pg/mL (group AFB pos) [34]			Median (IQR): 109 (108–110) pg/mL [28]			Median (IQR): 191 [31–788] pg/mL [23]		Median (IQR): 127.8 (98.9-141.7) pg/mL [34] Median (IQR): 3.9 (3.4-5.7) pg/mL [34]			Median (IQR): 108 (108–109) pg/mL [28]			Median (IQR): 39 [0– 205] pg/mL [23]		Median (IQR): 125.4 (113.9-143.2) pg/mL [34] Median (IQR): 3.2 (1.0-4.4) pg/mL [34]
IFN-α2			Median (IQR): 1.6 (-1.6-7.5) pg/mL [52] Median (IQR): 1.0 (-1.6-7.5) pg/mL [52]								Median (IQR): 3.8 (1.5-6.7) pg/mL [52]								Median (IQR): 0.0 (-3.2-3.8) pg/mL [52]
IL-1RA			Median (IQR): 22.7 (12.3-42.9) pg/mL [52] Median (IQR): 0.9 (-3.5-9.2) pg/mL [52]			Median (range): 10.6 (2.7– 22.2) ng/mL [32]		Median (IQR): 199.7 (183.6-227.1) pg/mL (group AFB neg) [34] Median (IQR): 269.4 (229.5-419.7) pg/mL (group AFB pos) [34] Median (IQR): 361.9 (175.8-571.2) pg/mL(group AFB neg) [34] Median (IQR): 317.7 (228.1-494.2) pg/mL (group AFB pos) [34]			Median (IQR): 8,491 (6,966–9,885) pg/mL [28] Median (IQR): 19.1 (3.2-51.9) pg/mL [52]			Median (range): 6.4 (2.8–8.5) ng/mL [32]		Median (IQR): 282.9 (222.3-320.0) pg/mL [34] Median (IQR): 484.8 (307.1-588.8) pg/mL [34]			Median (IQR): 5,837 (5,528–6,869) pg/mL [28] Median (IQR): -4.5 (-12.2- -0.7) pg/mL [52]					Median (IQR): 306.7 (282.3-371.9) pg/mL [34] Median (IQR): 80.1 (62.5-98.3) pg/mL [34]
sIL-1R1								Median (IQR): 41.4 (36.9-50.2) pg/mL (group AFB neg) [34] Median (IQR): 36.9 34.7-48.0) pg/mL (group AFB pos) [34] Median (IQR): 51.2 (47.9-56.3) pg/mL (group AFB neg) [34] Median (IQR): 49.5 (45..8-53.3) pg/mL (group AFB pos) [34]								Median (IQR): 41.3 (34.7-70.5) pg/mL [34] Median (IQR): 46.2 (44.5-49.5) pg/mL [34]								Median (IQR): 54.7 (46.9-77.9) pg/mL [34] Median (IQR): 47.9 (42.9-56.3) pg/mL [34]
sIL-1R2								Median (IQR): 14.5 (10.7-20.0) ng/mL (group AFB neg) [34] Median (IQR): 12.4 (11.2-18.1) ng/mL (group AFB pos) [34] Median (IQR): 10.1 (8.9-12.2) ng/mL (group AFB neg) [34] Median (IQR): 9.8 (8.0-12.8) ng/mL (group AFB pos) [34]								Median (IQR): 15.3 (11.2-18.2) ng/mL [34] Median (IQR): 9.7 (7.5-12.0) ng/mL [34]								Median (IQR): 12.8 (9.1-19.7) pg/mL [34] Median (IQR): 12.3 (9.0-13.6) ng/mL [34]
IL-2R	mRNA expression, Median (range): 10.49 (0.00-32.29) [44]								mRNA expression, Median (range): 9.24 (0.00-41.03) [44]		Median (IQR): 1,751 (1,696–1,817) pg/mL [28] Median: 463.4 U/ml [39]						mRNA expression, Median (range): 0.69 (0.00-4.35) [44]		Median (IQR): 1,714 (1,678–1,751) pg/mL [28] Median: 593.1 U/ml [39]
sIL-2Rα		Mean ± SD: 133.0±42.57 pg/mL [49] Mean ± SD: 84.33±19.23 pg/mL [49]								Mean ± SD: 7.448±4.532 pg/mL [49] Mean ± SD: 22.1±7.72 pg/mL [49]								Mean ± SD: 31.93±14.46 pg/mL [49]
TNF-α	mRNA expression, Median (range): 5.09 (2.00-38.57) [44]	Median (IQR): 32.2 (21.5–66.7) pg/mL [29] Median (IQR): 94.9 (19.9-633.7) pg/mL [21] Median (IQR): 477.4 (112.9-940.5) pg/mL [52] Median (IQR): 338.4 (208.5-1097.0) pg/mL [52]	TBA/NI Fold change:2.37459867 [41] Median (IQR): 30.4 (11.7–40.9) pg/mL [29] Median (IQR): -57.9 (-310.7-51.9) pg/mL [52]		Median (IQR): 837.5 (170.5-1496) pg/mL [50]	Median (IQR): 544 [172–959] pg/mL [23]		Median (IQR): 22.9 (18.4-53.6) pg/mL (group AFB neg) [34] Median (IQR): 51.5 (12.8-128.0) pg/mL (group AFB pos) [34] Median (IQR): 22.9 (14.7-28.4) pg/mL (group AFB neg) [34] Median (IQR): 20.7 (15.0-26.5) pg/mL (group AFB pos) [34]	mRNA expression, Median (range): 3.42 (0.68-13.36) [44]	Median (IQR): 42.5 (19.3–68.2) pg/mL [29] Median (IQR): 15.9 (7.3-293-6) pg/mL [25] Median (IQR): 157.2 (98.3-262.1) pg/mL [52]	LTBI/NI Fold change: 1.453060 [41] Median (IQR): 28.4 (6.4–37) pg/mL [29] Median (IQR): 167 (151–195) pg/mL [28] Median: 31.2 pg/mL [39] Median (IQR): -7.3 (-48.7-44.2) pg/mL [52]		GM: 2343 pg/ml [24] GM: 2464 pg/ml [24] Median (IQR): 1699 (827-3552) pg/mL [50]	Median (IQR): 175 [0–1040] pg/mL [23]		Median (IQR): 70.4 (42.8-253.2) pg/mL [34] Median (IQR): 13.5 (11.6-14.6) pg/mL [34]	mRNA expression, Median (range): 1.00 (0.22-6.16) [44]	Median (IQR): 30.5 (23.2–42.3) pg/mL [29] Median (IQR): 484.8 (315.1-598.4) pg/mL [52]	NI not stimulated /NI stimulated Fold change: 1.1556326 [41] Median (IQR): 28.3 (13.4–35.6) pg/mL [29] Median (IQR): 161 (152–220) pg/mL [28] Median: 12.5 pg/mL [39] Median (IQR): -87.2 (-204.8- -15.2) pg/mL [52]		GM: 2329 pg/ml [24] GM: 2488 pg/ml [24]	Median (IQR): 29 [0–543] pg/mL [23]		Median (IQR): 117.3 (76.9-268.2) pg/mL [34] Median (IQR): 12.5 (10.2-17.5) pg/mL [34]
TNF-β			Median (IQR): 0.0 (0.0-0.0) pg/mL [52] Median (IQR): 0.0 (0.0-0.0) pg/mL [52]								Median (IQR): 0.0 (0.0-0.0) pg/mL [52]								Median (IQR): 0.0 (0.0-0.0) pg/mL [52]
TNF-αR
CXCL5 (ENA-78)
CXCL6 (GCP-2/LIX)
CXCL8 (IL-8)
CXCL9 (MIG)	mRNA expression, Median (range):148.90 (0.00-1500.00) [44]		TBA/NI Fold change: 2.878799 [41]						mRNA expression, Median (range): 8.50 (0.00-300.00) [44]		LTBI/NI Fold change: 1.424819 [41] Median (IQR): 515 (419-684) pg/mL [28]						mRNA expression, Median (range): 0.00 (0.00-136.02) [44]		NI not stimulated /NI stimulated Fold change: 1.200000 [41] Median (IQR): 358 (358–361) pg/mL [28]
CXCL10 (IP-10)	mRNA expression, Median (range): 205.04 (10.54-1500.00) [44]	Median (IQR): 252.4 (123.9–448) pg/mL [29] Median (IQR): 1176 (664.8–2444) pg/mL [26] Mean ± SD: 3865±695.7 pg/mL [49] Mean ± SD: 4060±646.1 pg/mL [49]	TBA/NI Fold change: 3.466649909 [41] Median (IQR): 1846.0 (769.2–3163) pg/mL [29] Median (IQR): 20 000 (13 858–20 000) pg/mL [26] Median (IQR): 14446.0 (5313.0->20000.0) pg/mL [21] Median (IQR): 5874.0 (4071.0-6938.0) pg/mL [52] Median (IQR): 2646.0 (727.0-4581.0) pg/mL [52] Mean ± SD: 5555±580.6 pg/mL [49] Mean ± SD: 7002±841.9 pg/mL [49]	Median (IQR): 482.8 (51.2-737.3) pg/mL [50]	Median (IQR): 525 (161.6-1230) pg/mL [50]		Median (IQR): 174.9 (123.8–368.4) pg/mL [26]		mRNA expression, Median (range): 50.66 (5.23-1383.77) [44]	Median (IQR): 446.8 (207.1–1559) pg/mL [29] Median (IQR): 2248 (750.2–12010) pg/mL [26] Mean ± SD: 1347±129.8 pg/mL [49] Mean ± SD: 1761±289.0 pg/mL [49]	LTBI/NI Fold change: 5.20739568 [41] Median (IQR): 1876 (788.4–3478) pg/mL [29] Median (IQR): 3,903 (3,004–5,080) pg/mL [28] Median (IQR): 20 000 (17 076–20 000) pg/mL [26] Median (IQR): 18224.0 (12470->20000.0) pg/mL [21] Median (IQR): 6066.0 (2933.0-7166.0) pg/mL [52] Mean ± SD: 6217±922.8 pg/mL [49]	Median (IQR): 789.1 (378.3-1006) pg/mL [50]	Median (IQR): 1708 (743.3-3770) pg/mL [50]		Median (IQR): 102.7 pg/ml (72.9–144.5) [26]		mRNA expression, Median (range): 0.82 (0.00-29.39) [44]	Median (IQR): 253.1 (107.5–484.8) pg/mL [29] Median (IQR): 491.0 (207.2–1588) pg/mL [26] Mean ± SD: 1761±289.0 pg/mL [49] Mean ± SD: 1988±190.7 pg/mL [49]	NI not stimulated /NI stimulated Fold change: 0.584581902 [41] Median (IQR): 66.5 (0–24.6) pg/mL [29] Median (IQR): 225 (76–668) pg/mL [28] Median (IQR): 963.3 (479.2–2619) pg/mL [26] Median (IQR): 235.3 (30.2-2851.0) pg/mL [52] Mean ± SD: 885.1±357 pg/mL [49] Mean ± SD: 2840±492.5 pg/mL [49]				Median (IQR): 71.14 (60.1–111.8) pg/mL [26]
CXCL11 (I-TAC)	mRNA expression, Median (range): 28.31 (0.00-1500.00) [44]								mRNA expression, Median (range): 5.13 (0.00-180.00) [44]								mRNA expression, Median (range): 1.55 (0.00-17.36) [44]
CXCL12 (SDF-1α+β)
CXCL13 (BCA-1)		Mean ± SD: 232.0±36.29 pg/mL [49]	Mean ± SD: 321.7±48.19 pg/mL [49]								Mean ± SD: 254.7±39.31 pg/mL [49]								Mean ± SD: 7.989±4.125 pg/mL [49] Mean ± SD: 50.48±21.36 pg/mL [49]
CCL1 (I-309)			TBA/NI Fold change: 2.061273 [41]								LTBI/NI Fold change: 1.191427 [41]								NI not stimulated /NI stimulated Fold change: 0.980675 [41]
CCL2 (MCP-1)			TBA/NI Fold change: 3.188441 [41] Median (IQR): -23.3 (-550.2-307.8) pg/mL [52] Median (IQR): -188.6 (-545.8- -21.03) pg/mL [52]								LTBI/NI Fold change: 1.4245508 [41] Median (IQR): 15,197 (5,395–22,172) pg/mL [28] Median (IQR): 180.7 (-1387.0-692.7) pg/mL [52]								NI not stimulated /NI stimulated Fold change: 1.208944 [41] Median (IQR): 5,449 (5,131–7,138) pg/mL [28] Median (IQR): -101.6 (-287.1-38.7) pg/mL [52]
CCL3 (MIP-1α)		Mean ± SD: 61.33±7.620 pg/mL [49] Mean ± SD: 51.58±6.058 pg/mL [49] Mean ± SD: 137.8±23.46 pg/mL [49]	TBA/NI Fold change: 11.55941 [41] Median (IQR): -90.5 (-424.9-206.4) pg/mL [52] Median (IQR): -60.0 (-301.5-107.4) pg/mL [52]							Mean ± SD: 32.09±6.796 pg/mL [49] Mean ± SD: 66.28±9.82 pg/mL [49]	LTBI/NI Fold change: 9.892162 [41] Median (IQR): 2,436 (1,607–2,728) pg/mL [28] Median (IQR): 194.1 (-136.2-345.4) pg/mL [52]							Mean ± SD: 19.75±7.562 pg/mL [49] Mean ± SD: 36.90±8.50 pg/mL [49]	NI not stimulated /NI stimulated Fold change: 3.400166 [41] Median (IQR): 2,193 (1,078–4,506) pg/mL [28] Median (IQR): 36.5 (-219.3-250.2) pg/mL [52]
CCL4 (MIP-1β)			Median (IQR): 1210.0 (0.0-4098.0) pg/mL [21] Median (IQR): 270.9 (-32.9-1575.0) pg/mL [52] Median (IQR): 8.2 (-242.3-87.3) pg/mL [52]								Median (IQR): 4,037 (2,286–4,869) pg/mL [28] Median (IQR): 3220 (960.8-7847.0) pg/mL [21] Median (IQR): 1451.0 (377.1-1740.0) pg/mL [52]								Median (IQR): 1,658 (768–1,796) pg/mL [28] Median (IQR): -99.1 (-762.2-91.8) pg/mL [52]
CCL5 (RANTES)				Median (IQR): 7049 (3413-12,921) pg/mL [50]							Median (IQR): 16,760 (15,483–16,760) pg/mL [28]	Median (IQR): 12,456 (6388-17,468) pg/mL [50]							Median (IQR): 13,402 (11,651–16,760) pg/mL [28]
CCL7 (MCP-3)			Mean ± SD: 1104±311.4 pg/mL [49] Mean ± SD: 781.7 ±202.2 pg/mL [49]								Mean ± SD: 216.1±70.56 pg/mL [49] Mean ± SD: 152.1±52.27 pg/mL [49]								Mean ± SD: 212.3±89.47 pg/mL [49]
CCL8 (MCP-2)			TBA/NI Fold change:5.863285 [41]								LTBI/NI Fold change: 4.585284 [41]								NI not stimulated /NI stimulated Fold change: 1.055971 [41]
CCL11 (Eotaxin)			Median (IQR): -15.5(-32.6- -5.2) pg/mL [52] Median (IQR): -4.8 (-18.2-4.4) pg/mL [52]								Median (IQR): 117 (106–130) pg/mL [28] Median (IQR): -23.2 (-54.5- -7.9) pg/mL [52]								Median (IQR): 106 (89–145) pg/mL [28] Median (IQR): -7.6 (-26.0-2.2) pg/mL [52]
CCL13 (MCP-4)
CCL15 (MIP-1δ)
CCL17 (TARC)
CCL20 (MIP-3α)
CCL21 (6Ckine)
CCL24 (Eotaxin-2)			Mean ± SD: 2322±363.6 pg/mL [49] Mean ± SD: 2410±453.6 pg/mL [49]								Mean ± SD: 1137±446.6 pg/mL [49]								Mean ± SD: 71.44±41.57 pg/mL [49] Mean ± SD: 150.2±37.46 pg/mL [49]
CCL26 (Eotaxin-3)
CCL27 (CTACK)
CX3CL1 (Fractalkine)
ICAM-1 (CD54)
sCD163
sCD14
sCD40L		Median (IQR): 1388.0 (245.2-9852.0) pg/mL [21] Median (IQR): 3995.0 (876.1-10245.0) pg/mL [21]	Median (IQR): 0.0 (0.0-4.6) pg/mL [21] Median (IQR): 1974.0 (883.0-13493) pg/mL [21]							Median (IQR): 599.4 (245.2-9852.0) pg/mL [25] Median (IQR): 1002.0 (220.4->20000) pg/mL [21]	Median (IQR): 309.4 (12.2-9944.0) pg/mL [21] Median (IQR): 1040.0 (383.2->20000) pg/mL [21]
I-TAG
MIF
LIF
LXA4								Median (IQR): 2.8 (2.8-3.0) ng/mL (AFT neg) [34] Median (IQR): 2.9 (2.8-3.0) ng/mL (AFT pos) [34] Median (IQR): 1.5 (1.3-1.8) ng/mL (AFT neg) [34] Median (IQR): 1.5 (1.3-1.7) ng/mL (AFT pos) [34]								Median (IQR): 1.7 (1.2-2.5) ng/mL [34] Median (IQR): 1.4 (1.2-1.7) ng/mL [34]								Median (IQR): 2.7 (2.6-2.8) ng/mL [34] Median (IQR): 1.5 (1.2-1.7) ng/mL [34]
15-Epi-LXA4								Median (IQR): 3.6 (2.8-3.8) ng/mL (AFT neg) [34] Median (IQR): 4.2 (0.3-15.0) ng/mL (AFT pos) [34] Median (IQR): 2.7 (2.3-3.2) ng/mL (AFT neg) [34] Median (IQR):2.9 (2.4-3.6) ng/mL (AFT pos) [34]								Median (IQR): 3.0 (0.3-10.4) ng/mL [34] Median (IQR): 2.3 (1.8-2.6) ng/mL [34]								Median (IQR): 3.0 (0.3-10.4) ng/mL [34] Median (IQR):2.2 (1.8-2.7) ng/mL [34]
